# Supplementary material
Source: publisher figshare collection journal article supplement (https://tandf.figshare.com/ndownloader/files/36389048)

Appendix

Table of Contents

[Figures 2](#_Toc107321440)

[Figure 1 2](#_Toc107321441)

[Figure 2 2](#_Toc107321442)

[Figure 3 3](#_Toc107321443)

[Figure 4 3](#_Toc107321444)

[Figure 5 4](#_Toc107321445)

[Figure 6 4](#_Toc107321446)

[Figure 7 5](#_Toc107321447)

[Figure 8 5](#_Toc107321448)

[Tables 6](#_Toc107321449)

[Procedure related complications 6](#_Toc107321450)

[Late complications 9](#_Toc107321451)

[CHA2DS2-VASC-parametres 11](#_Toc107321452)

[Cardiac history 16](#_Toc107321453)

[Arrhythmia 22](#_Toc107321454)

[Medication, baseline 24](#_Toc107321455)

[Medication, follow-up 28](#_Toc107321456)

[Relapse 32](#_Toc107321457)

[EHRA class at baseline 33](#_Toc107321458)

[EHRA class at follow-up 35](#_Toc107321459)

[Table 1: Dichotomization of continous data 37](#_Toc107321460)

[Table 2: Example of how the PPV and NPV-values were acquired 38](#_Toc107321462)

# Figures

## Figure 1


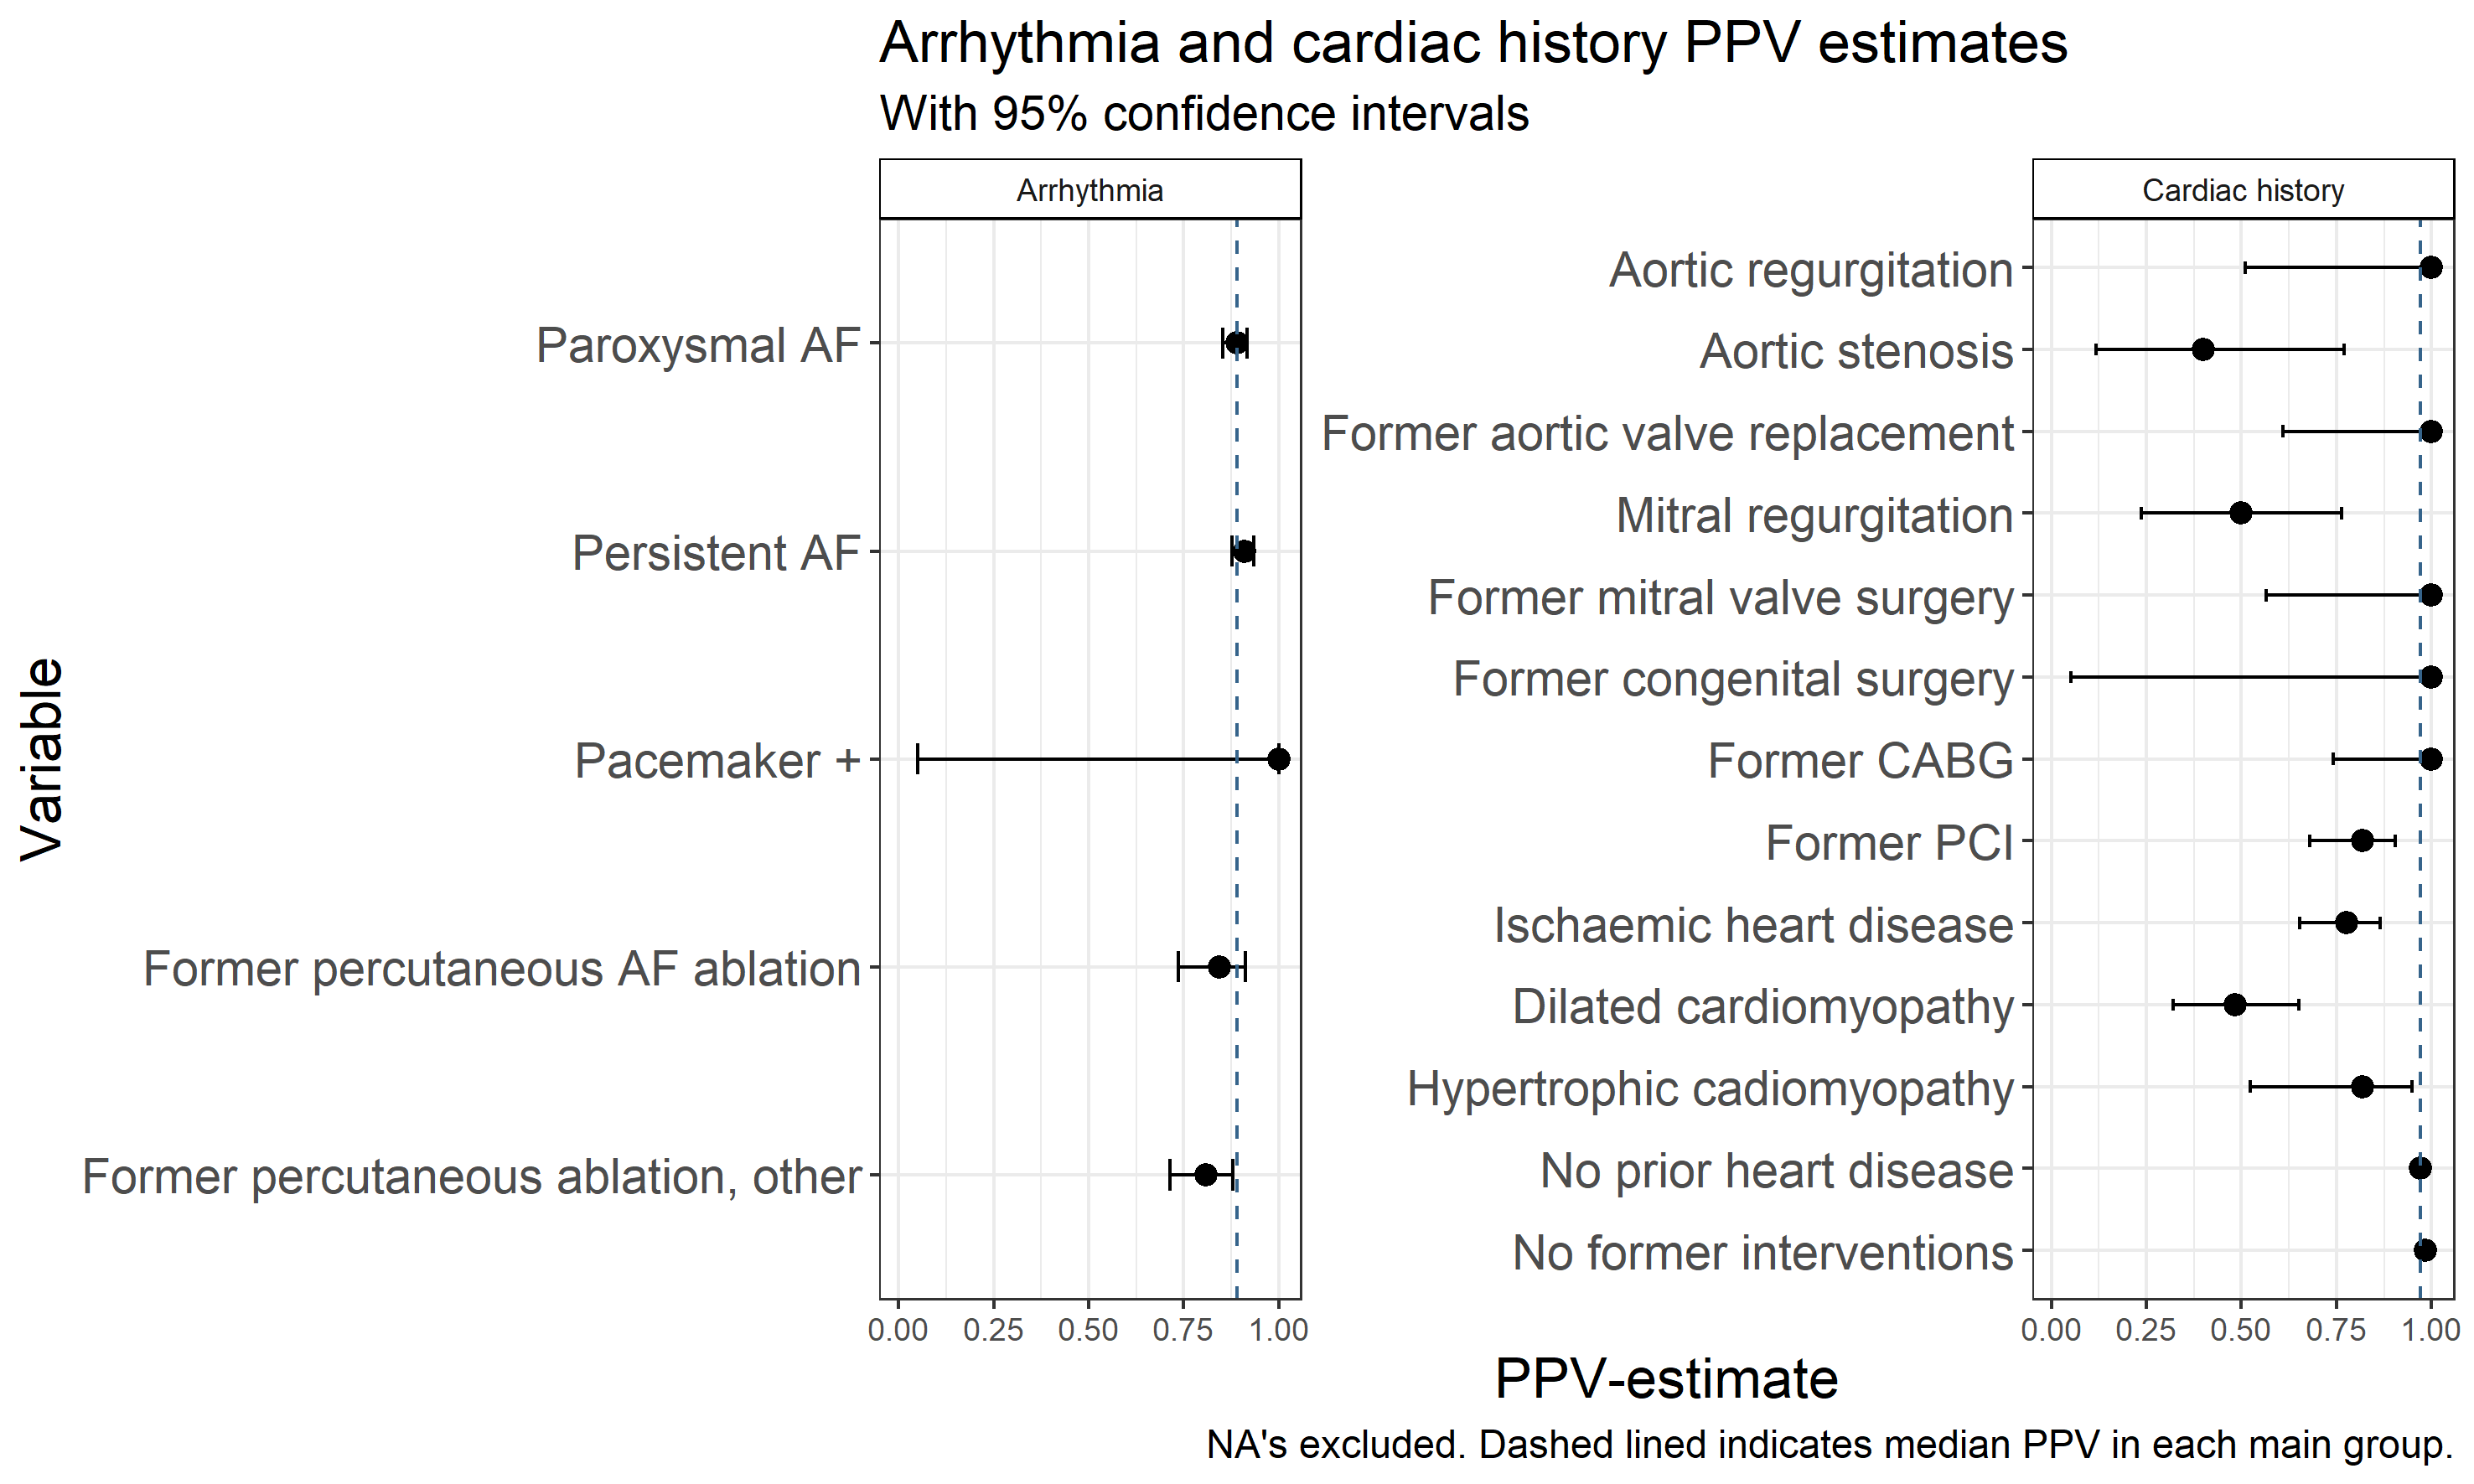


## Figure 2


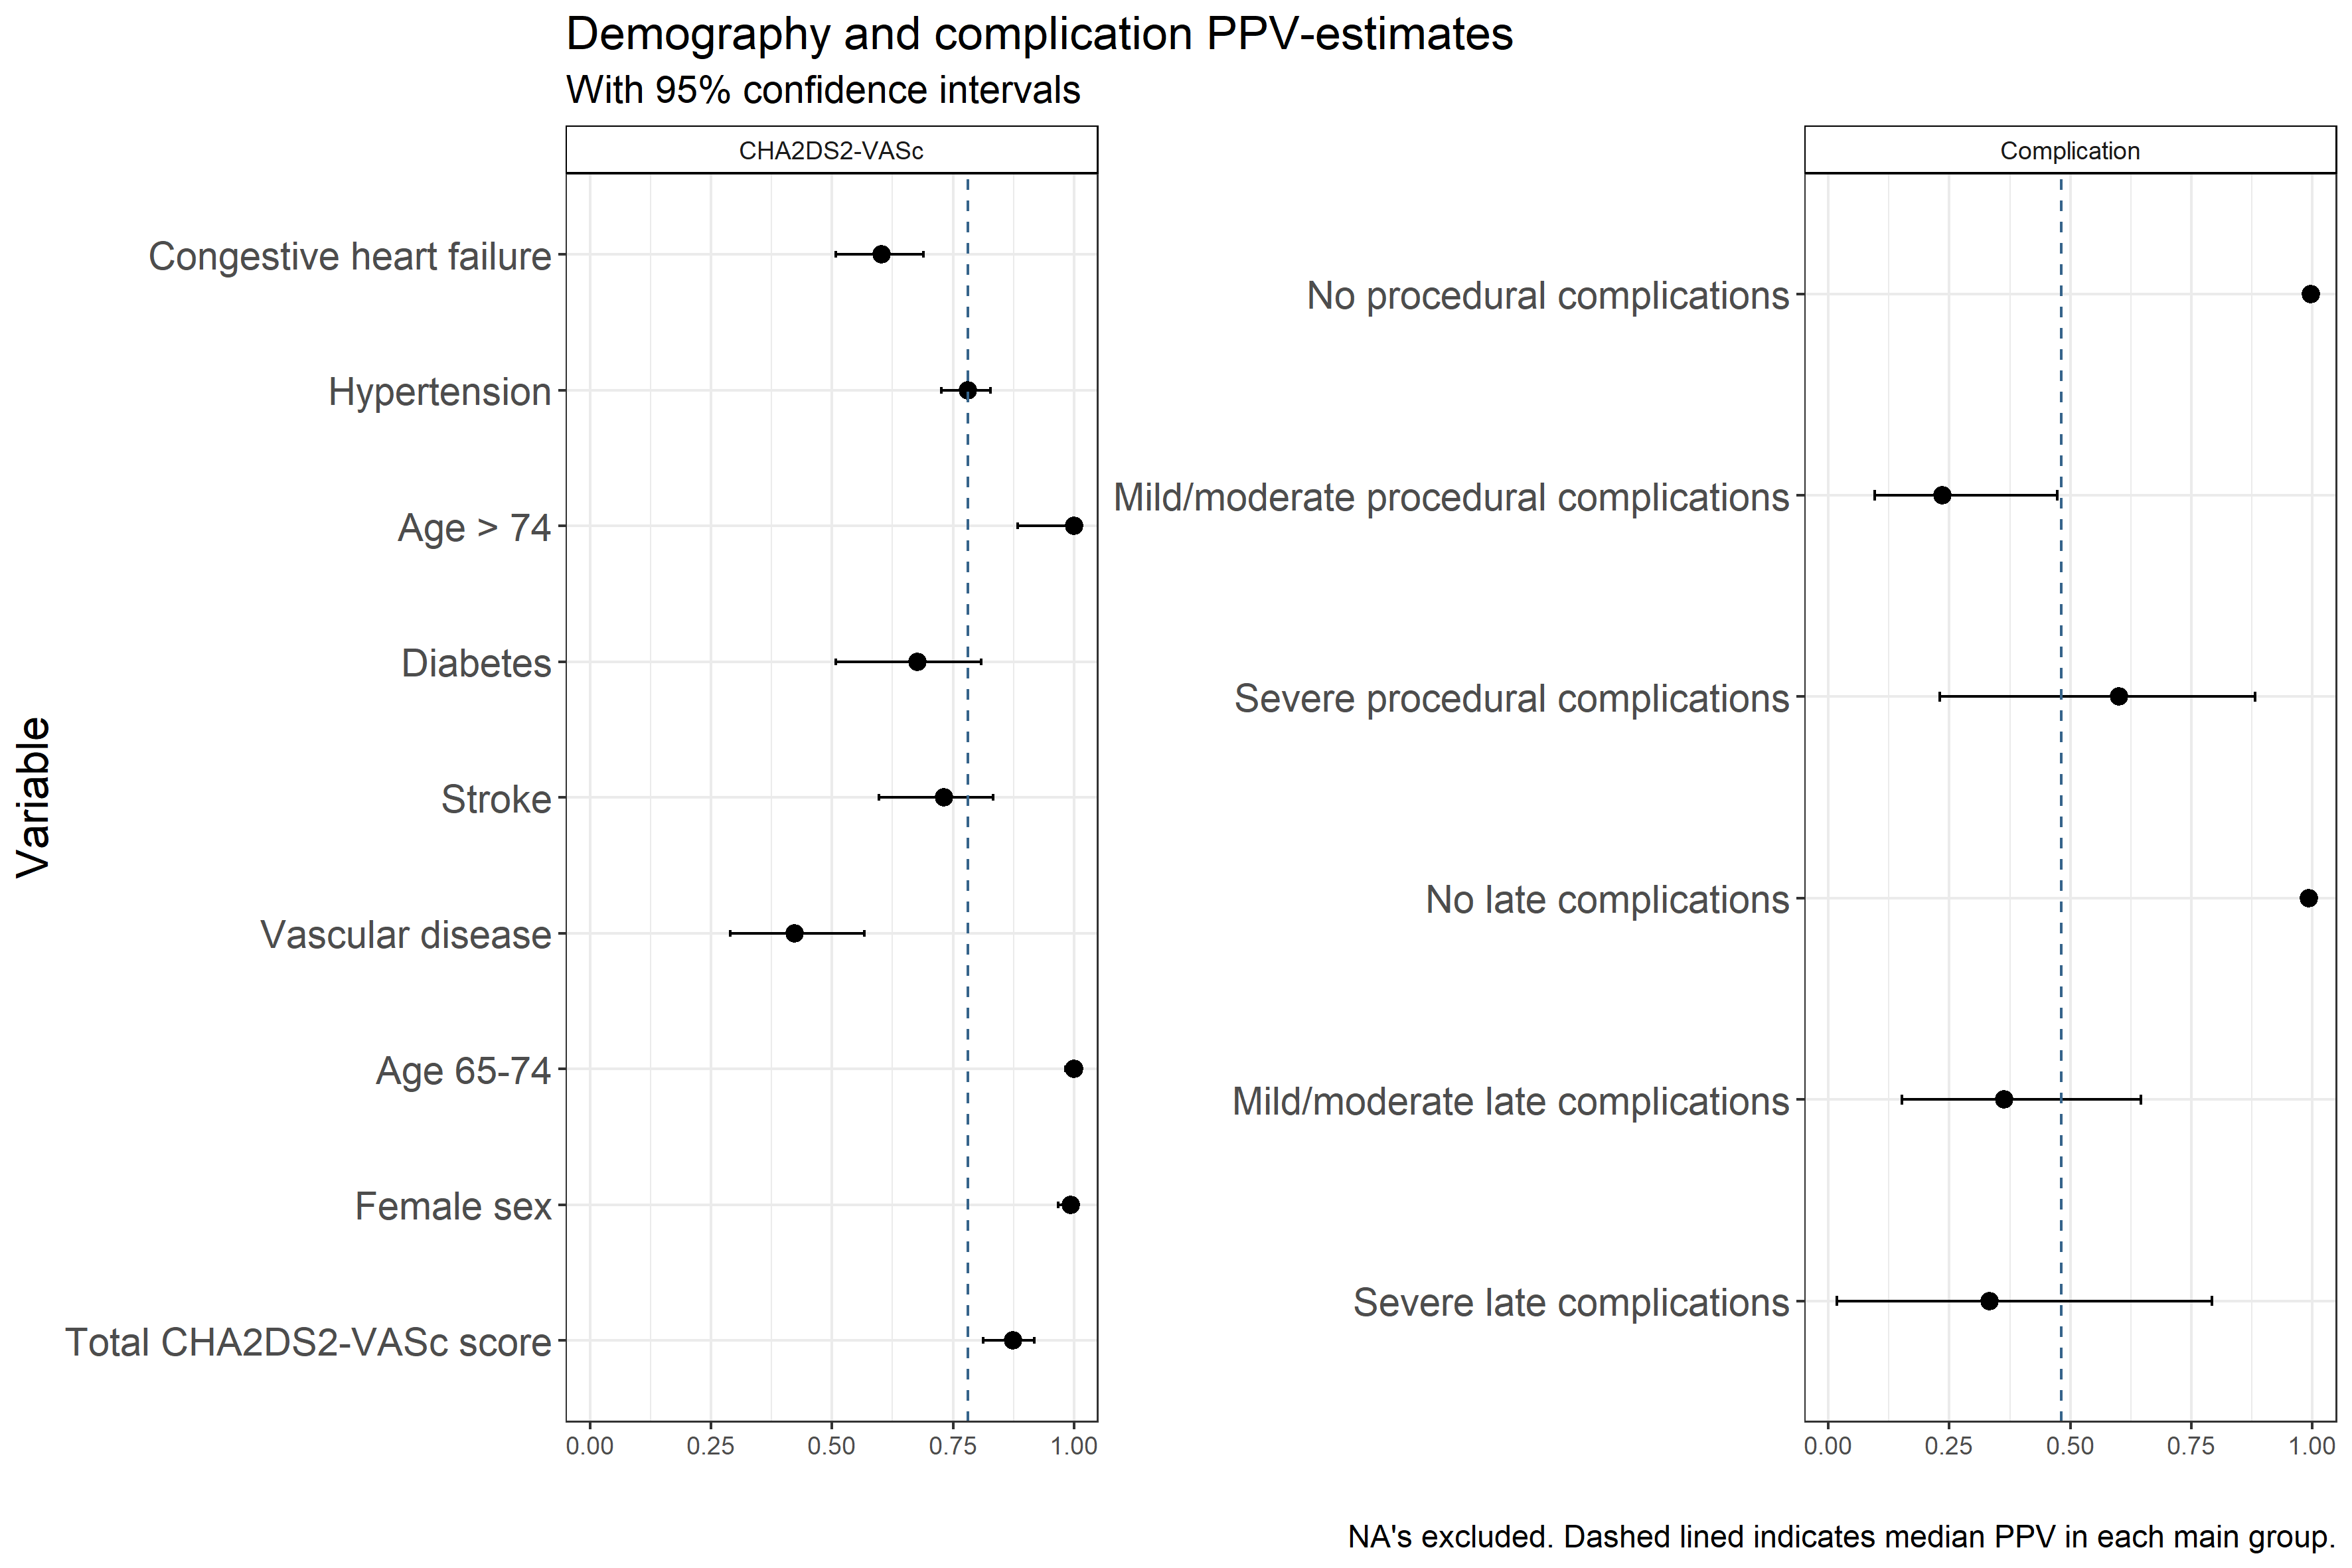


## Figure 3


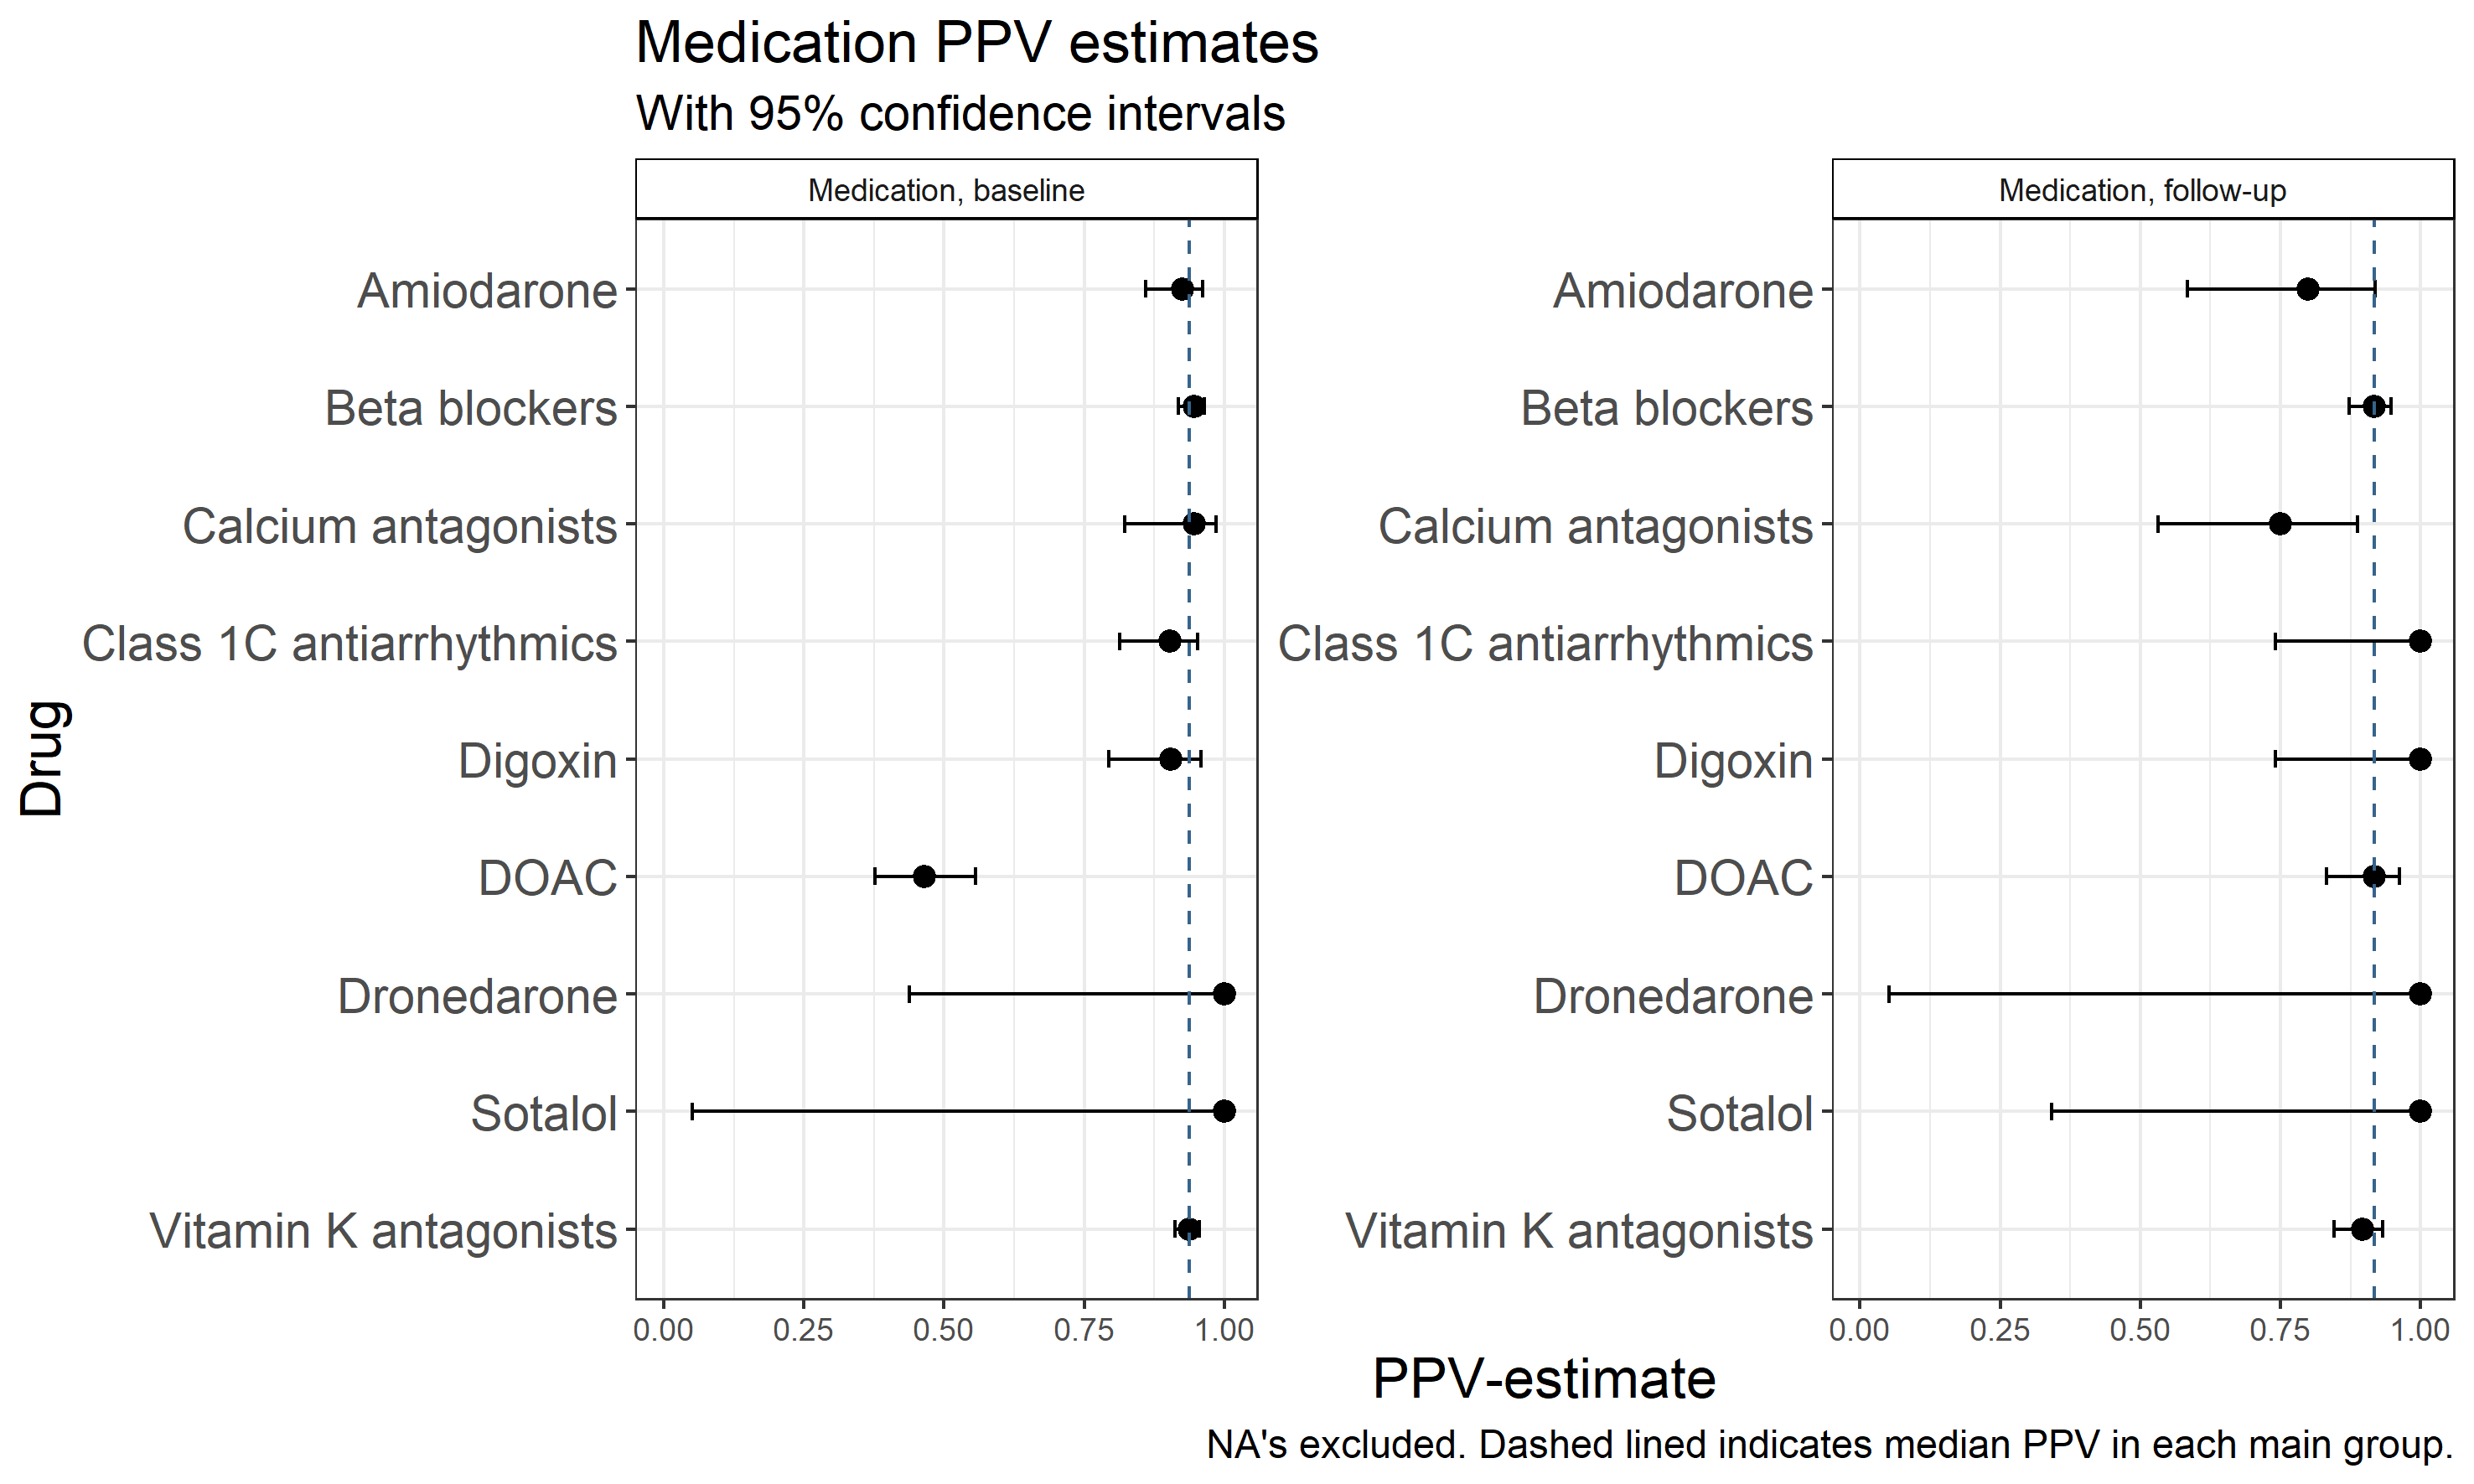


## Figure 4


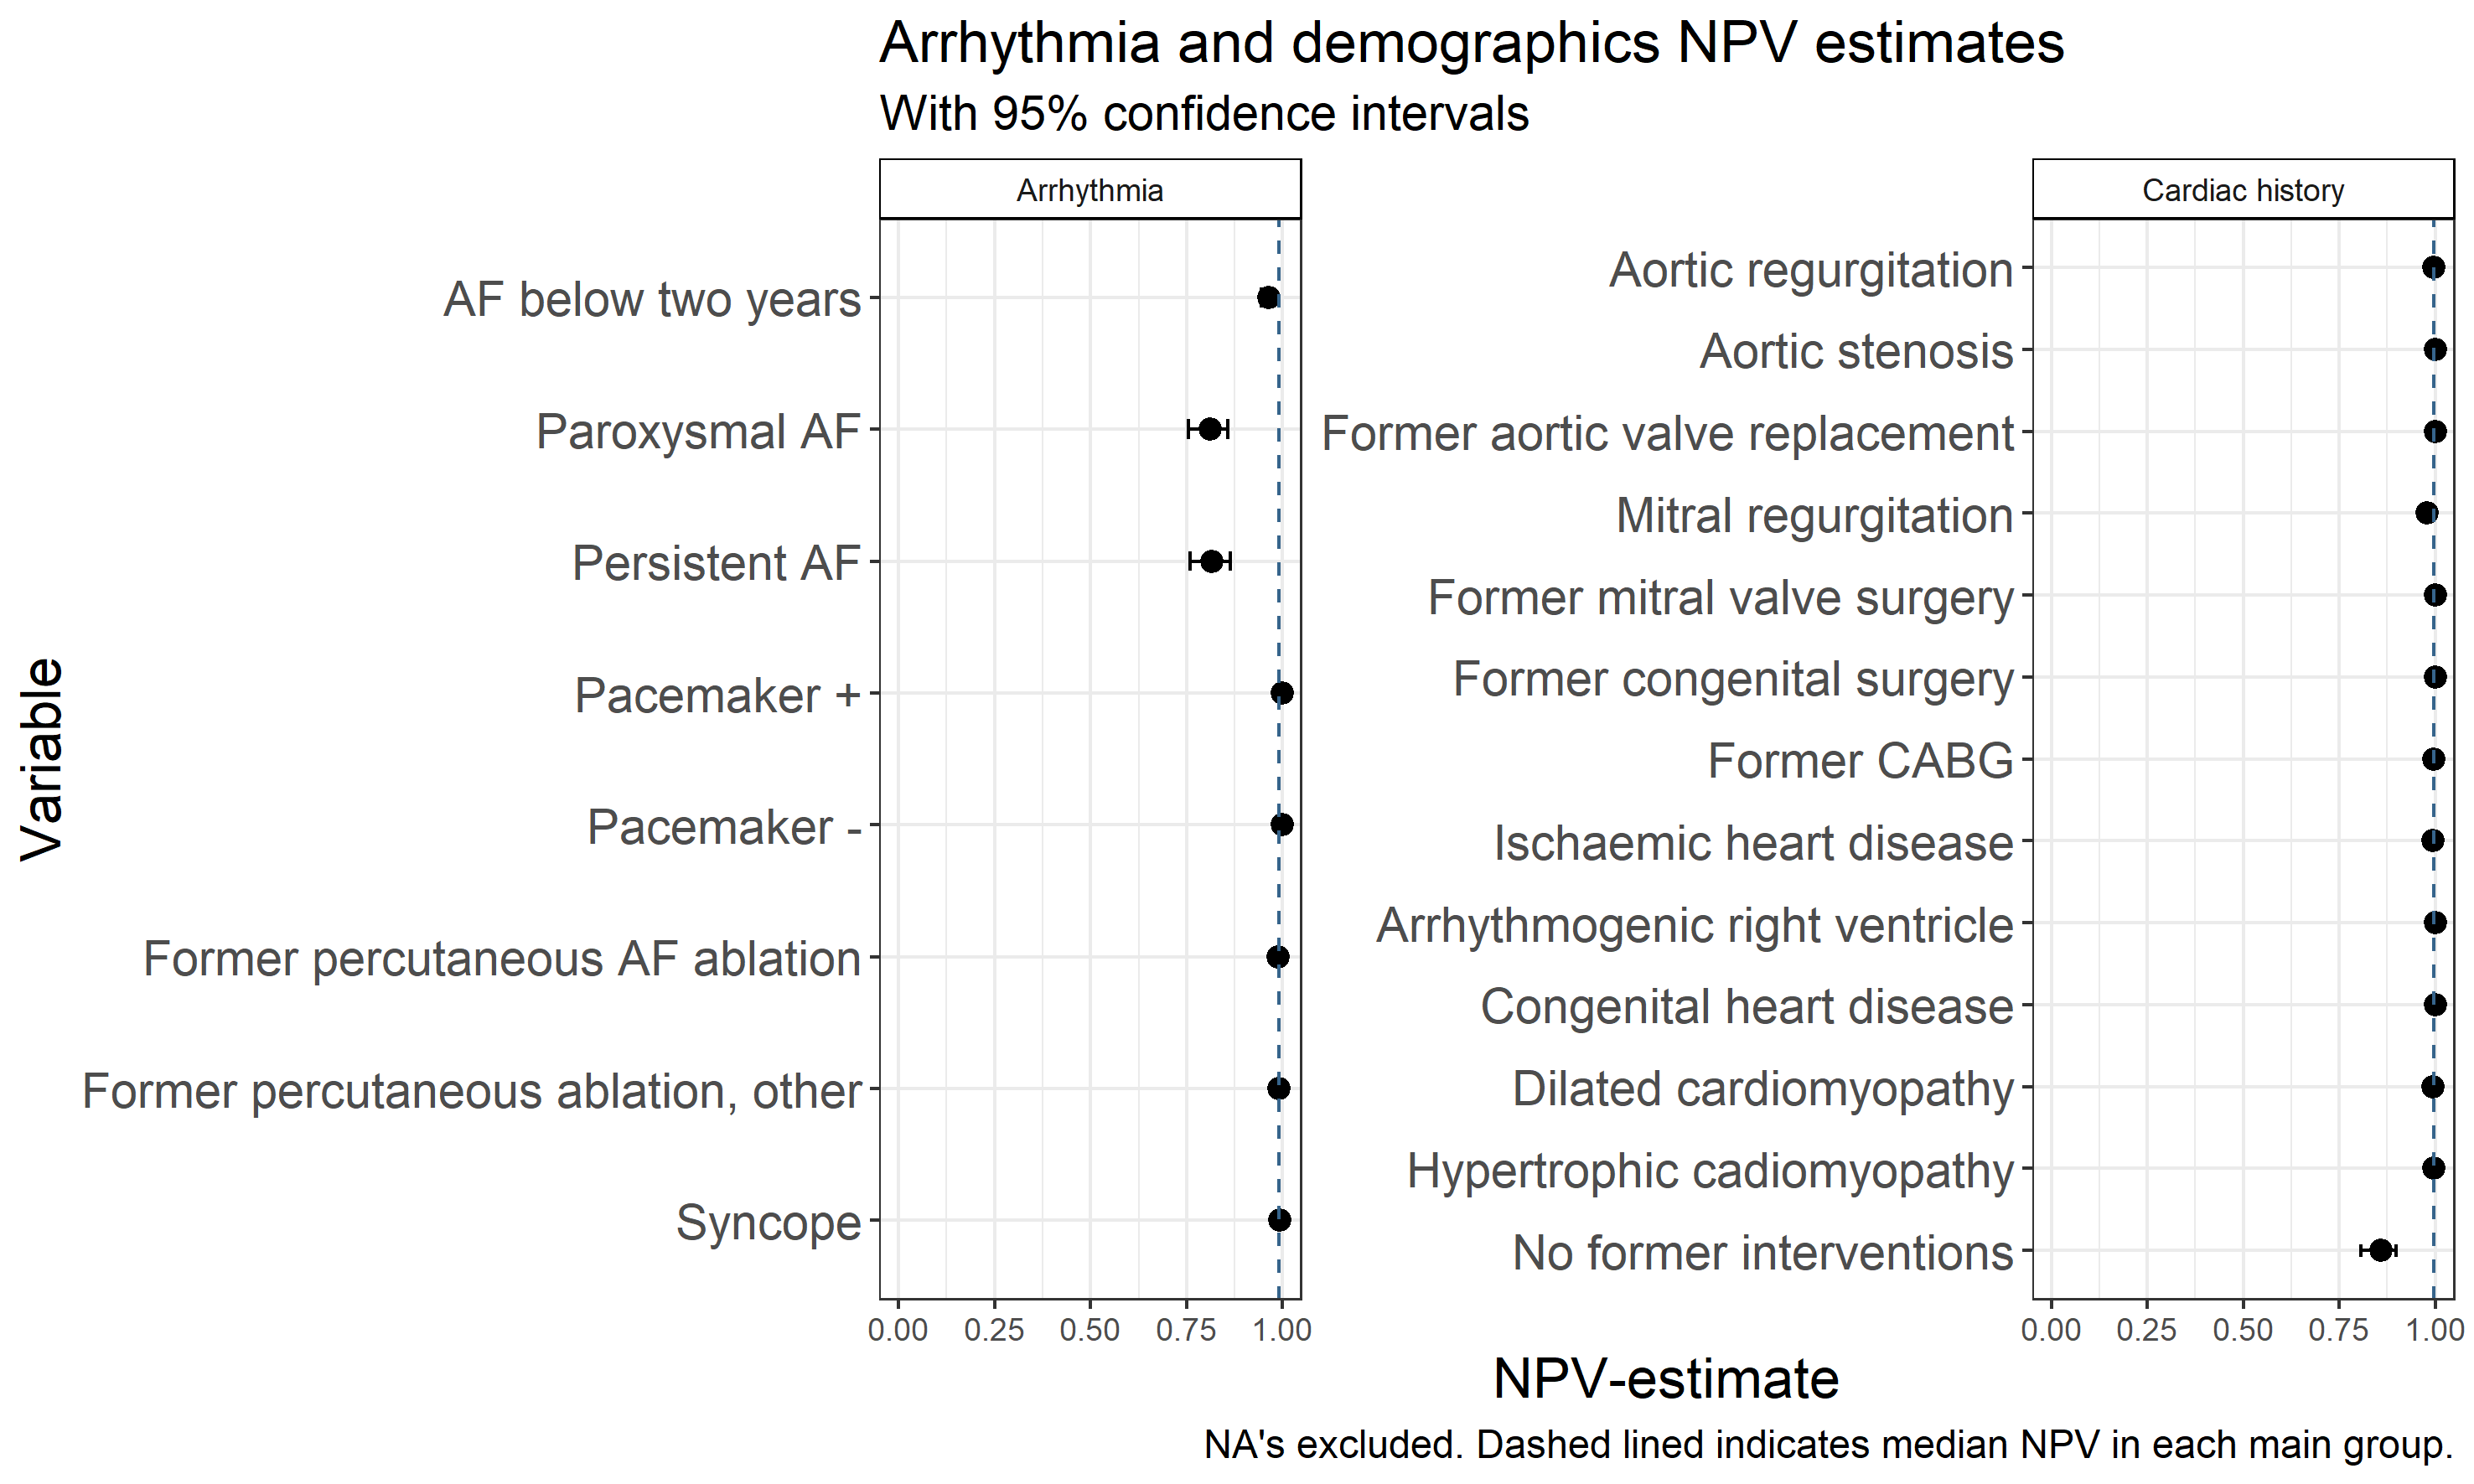


## Figure 5


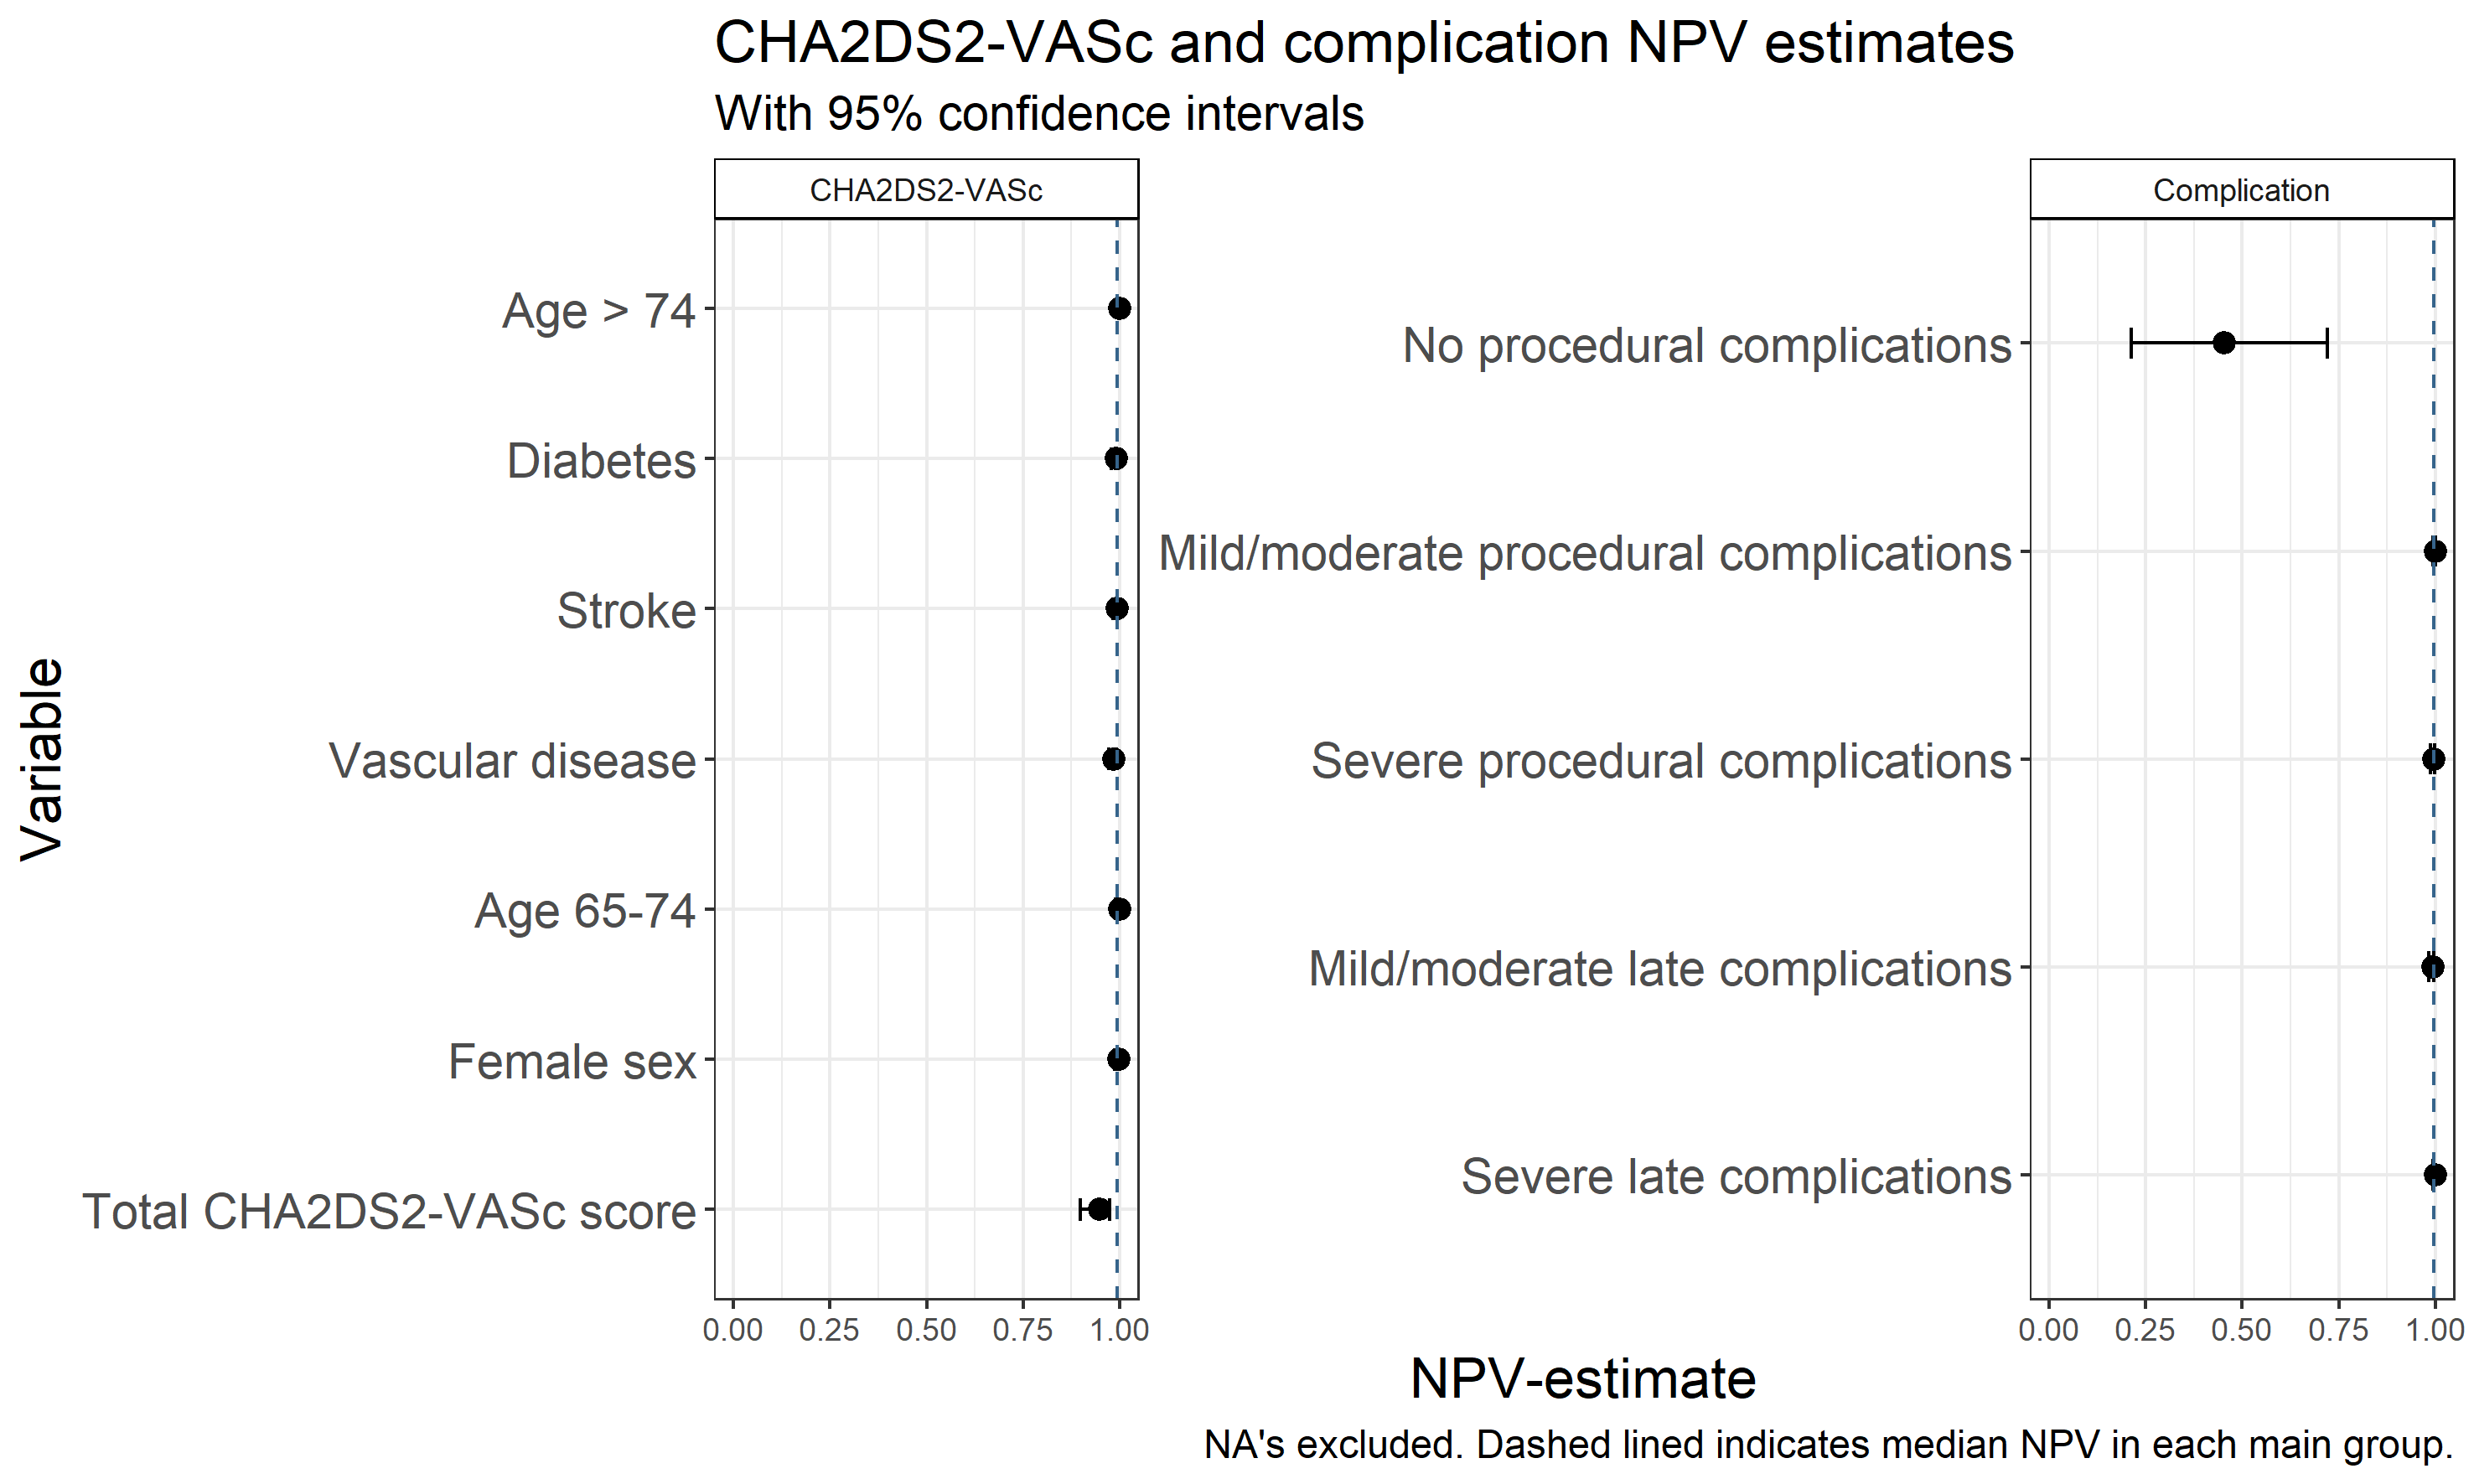


## Figure 6


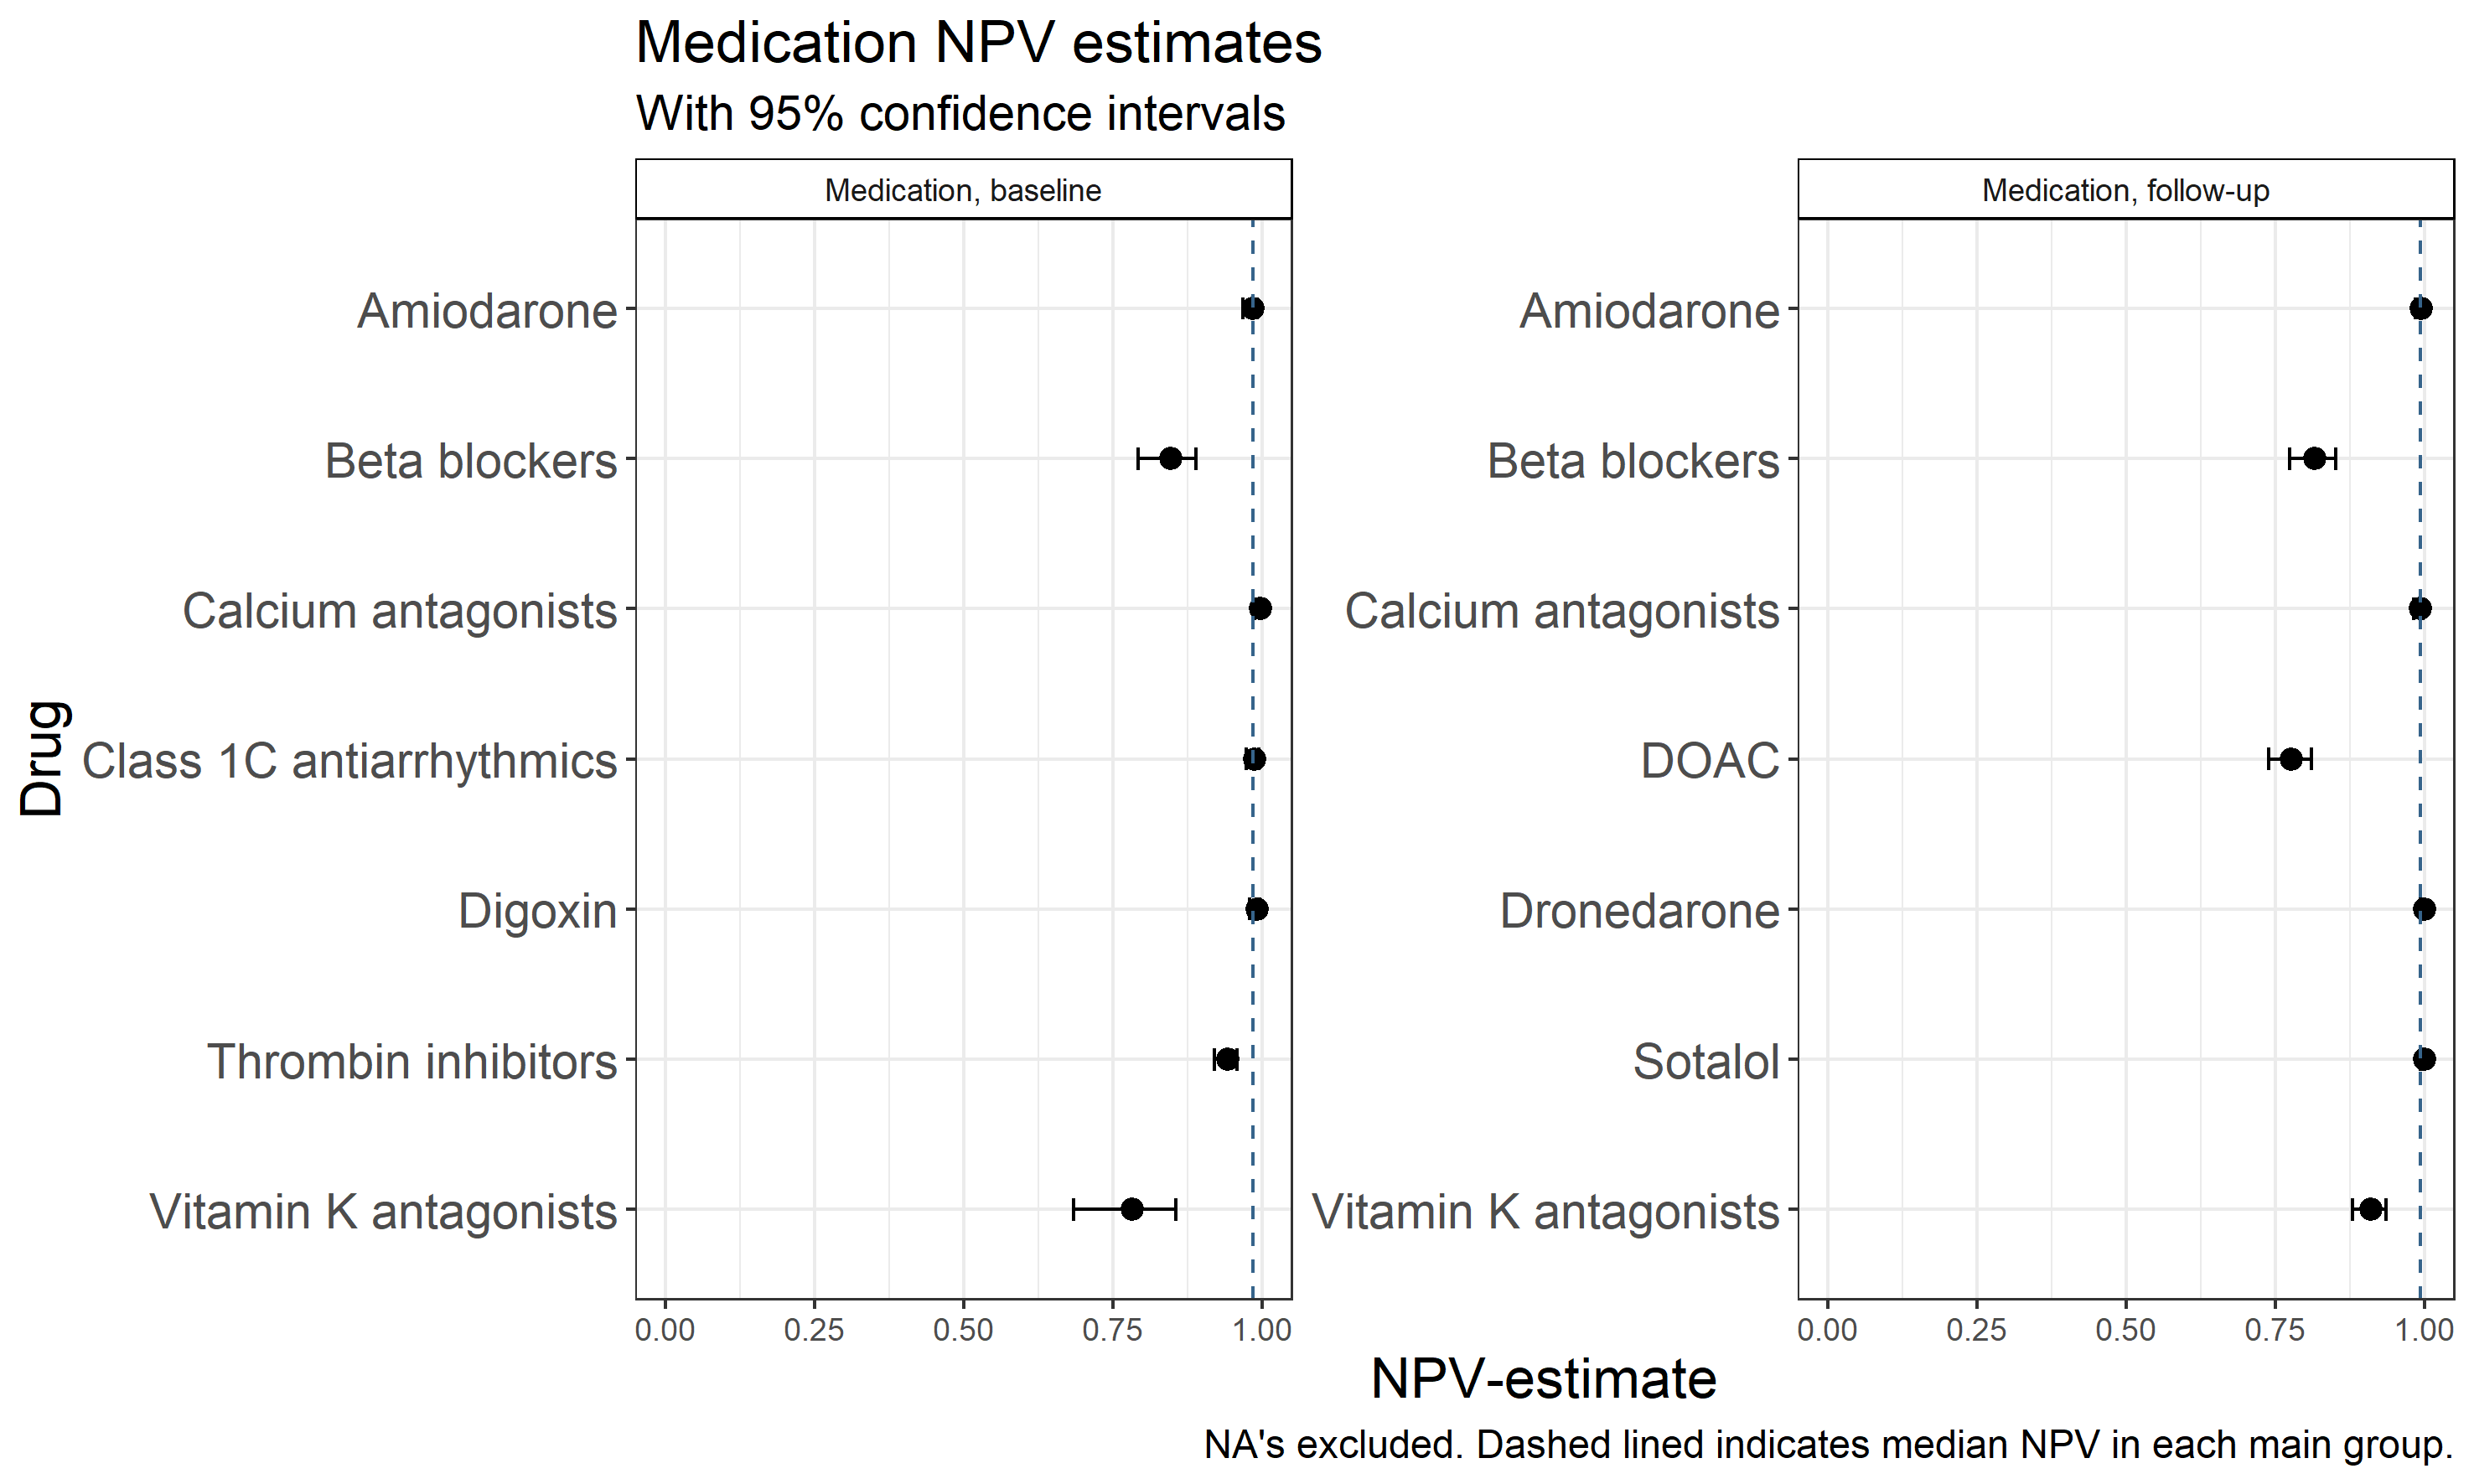


## Figure 7


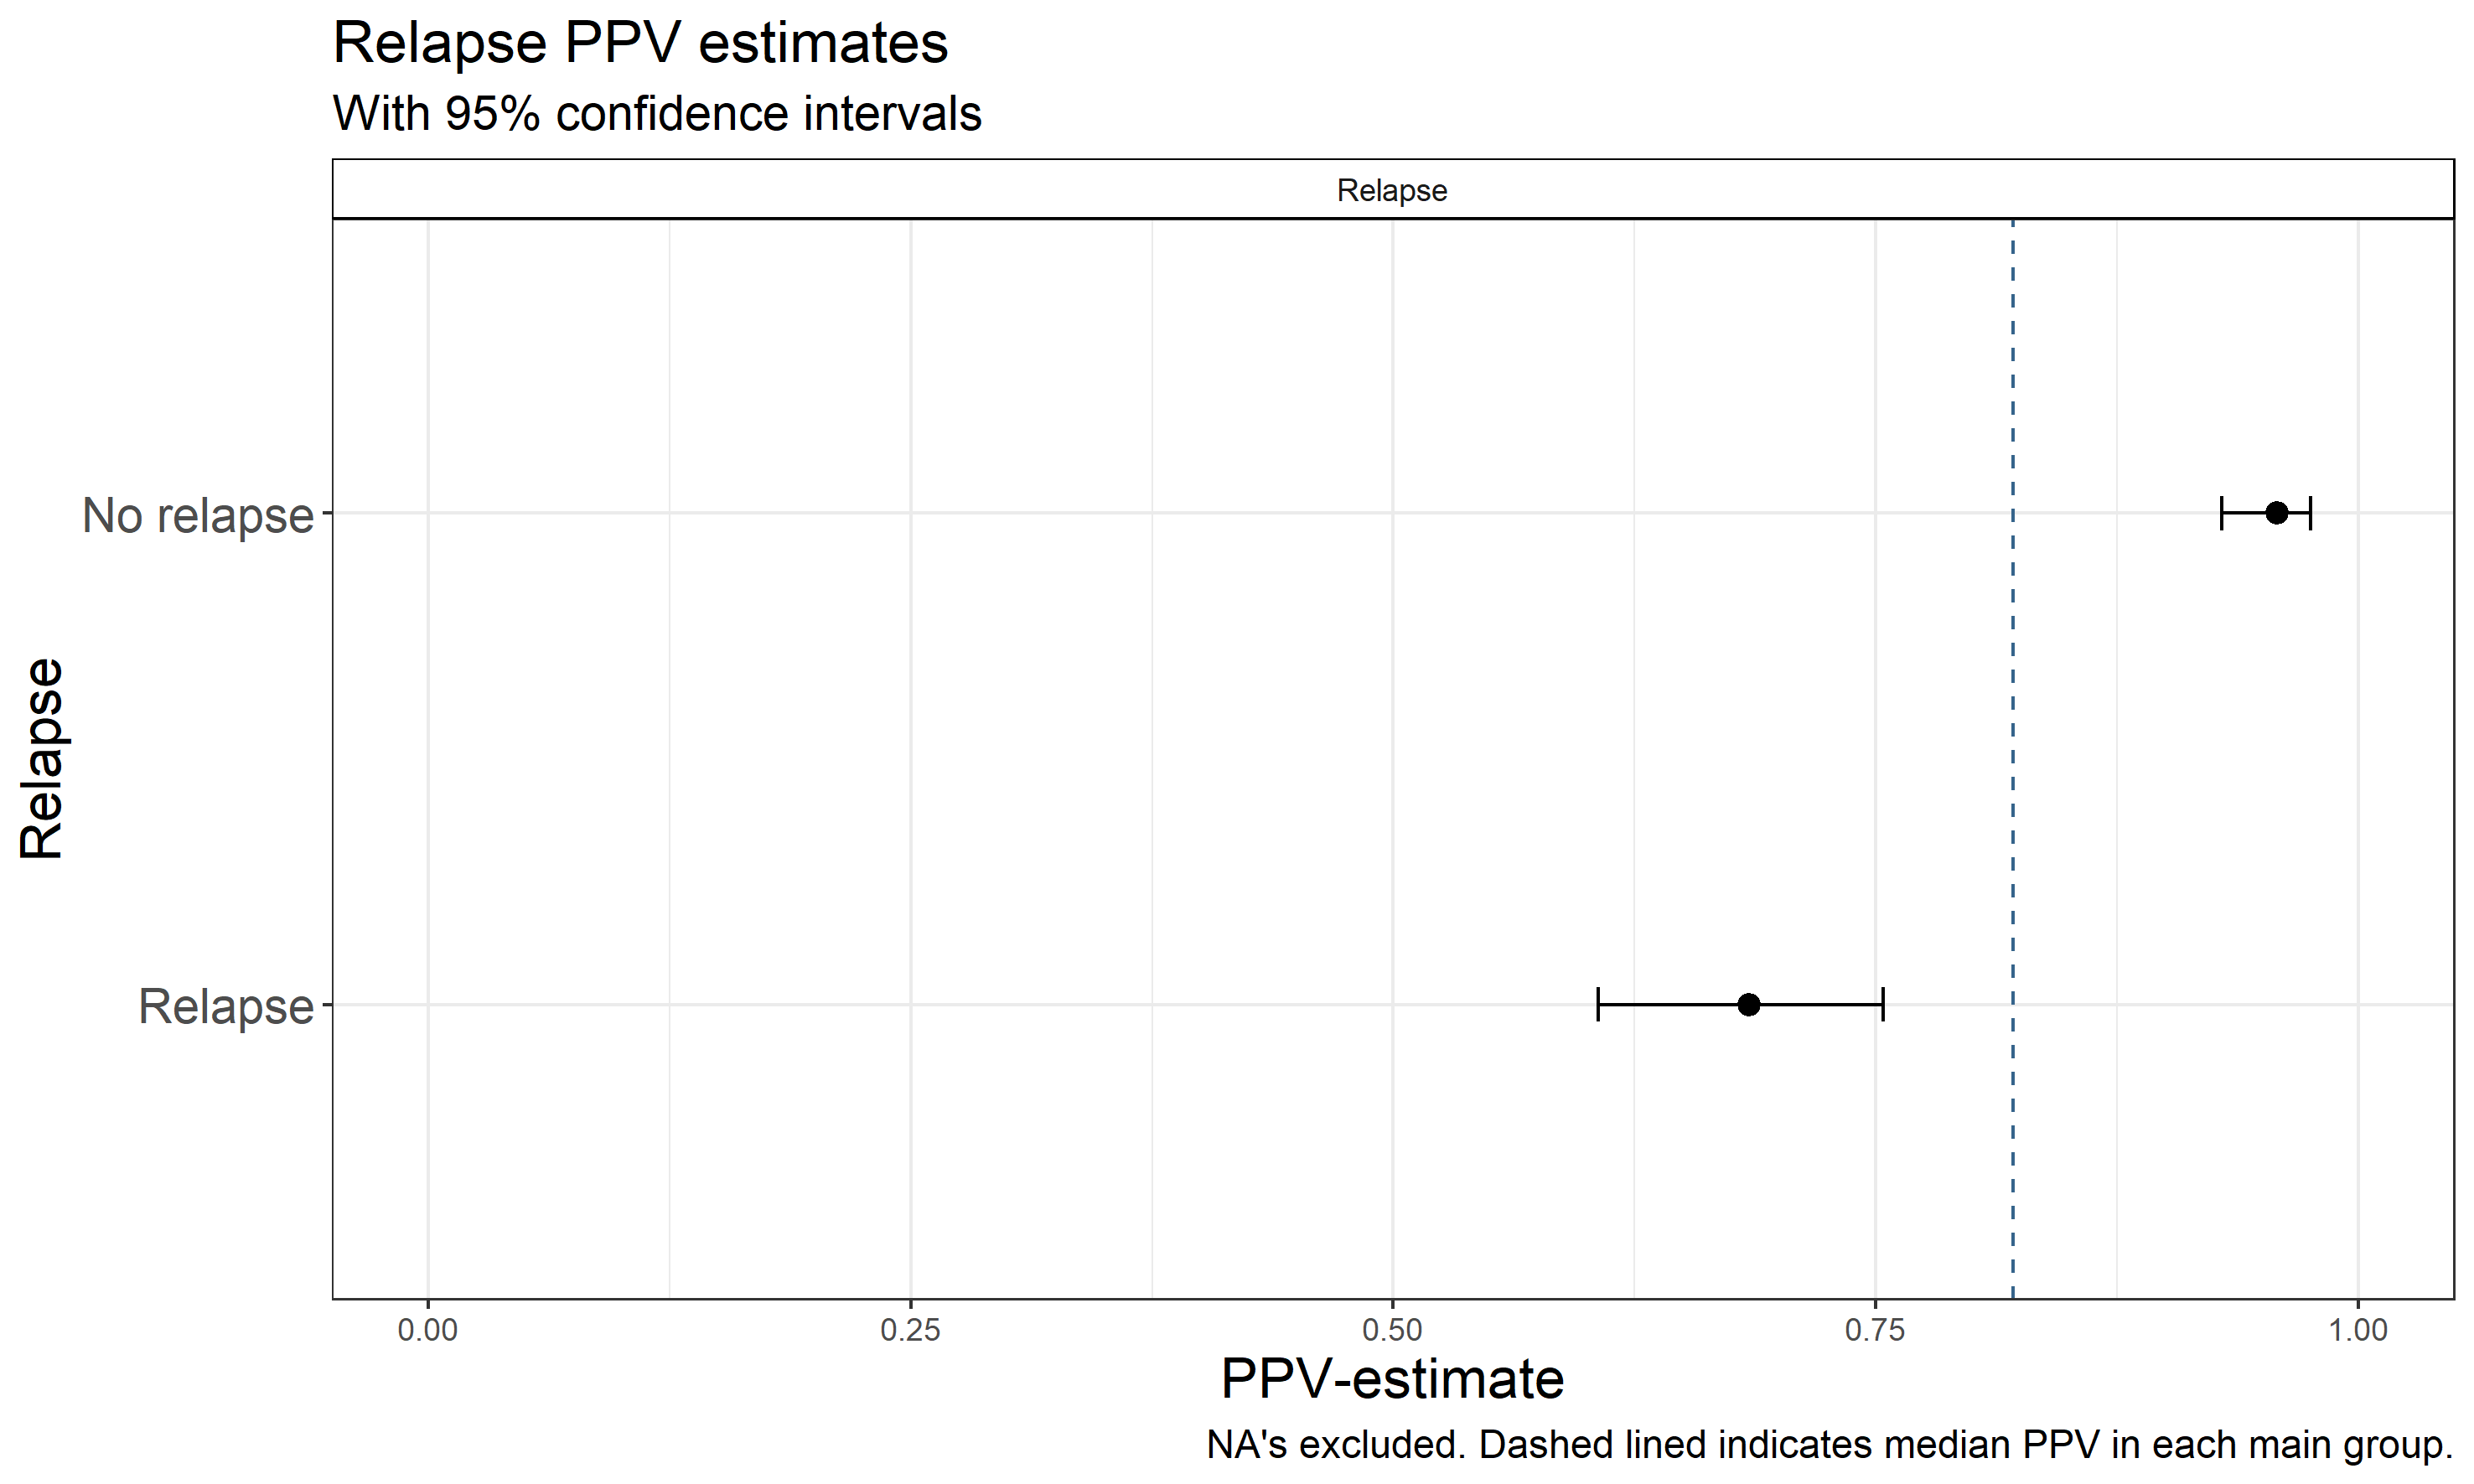


## Figure 8


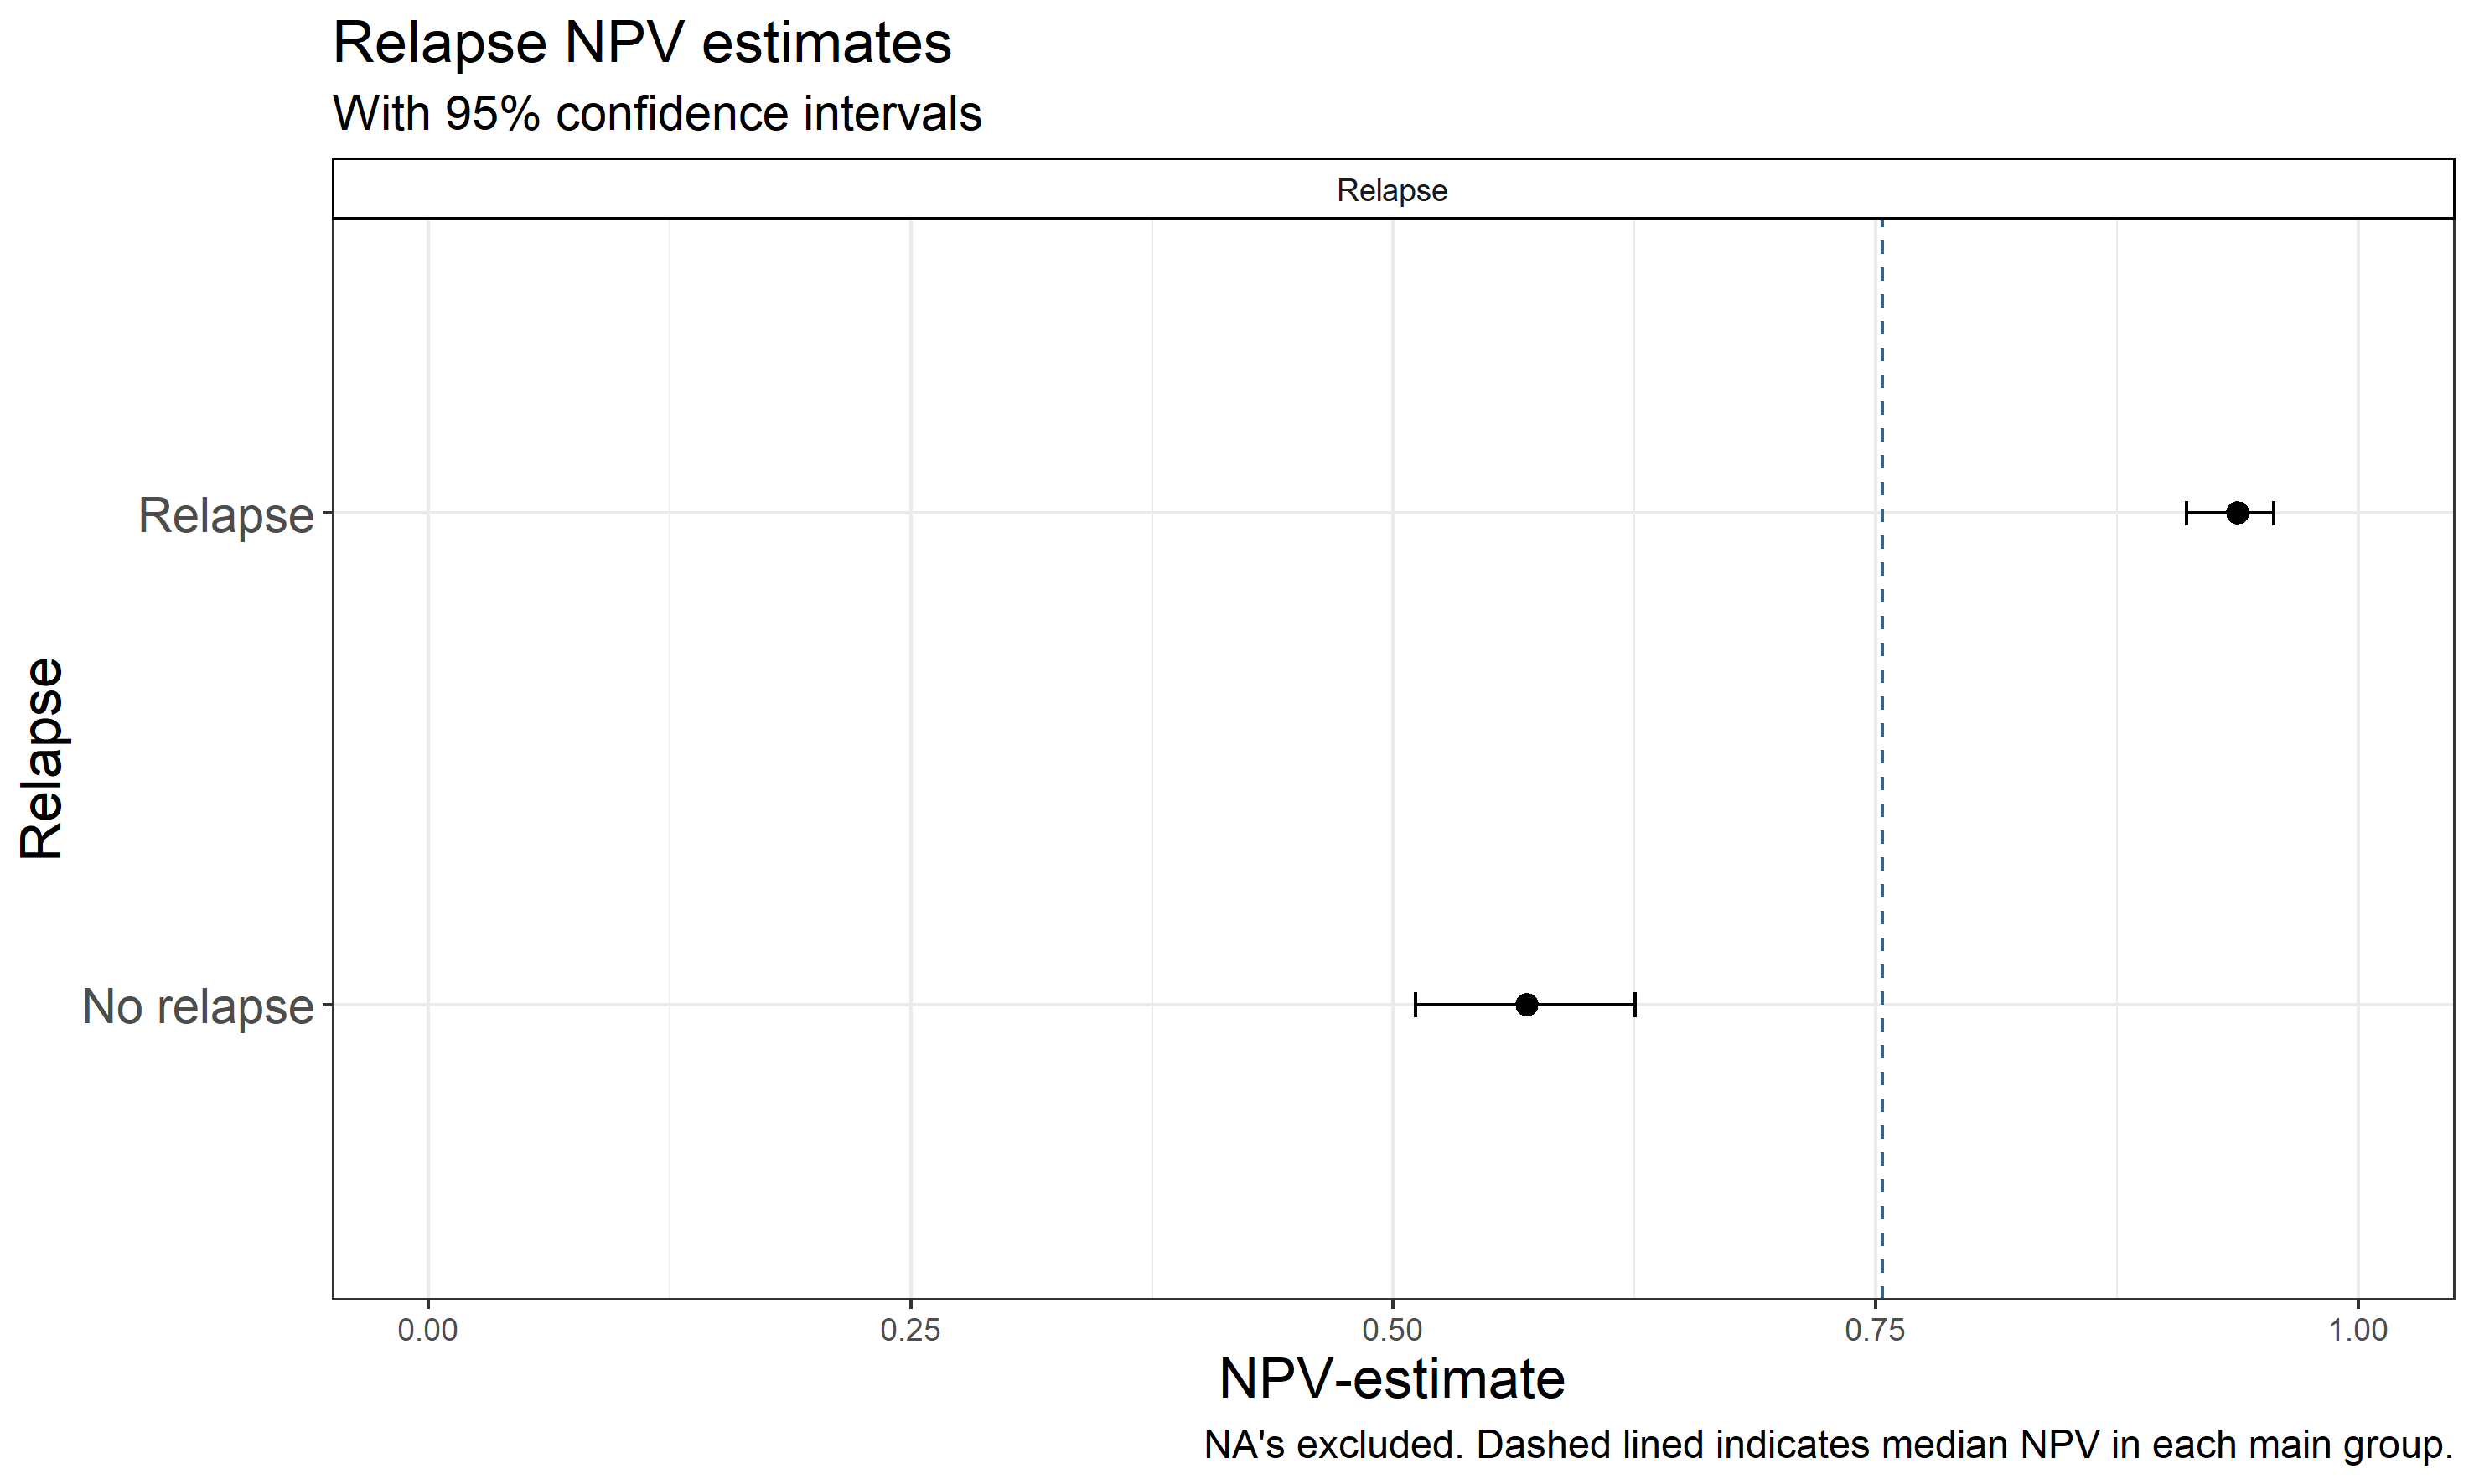


# Tables

## Procedure related complications

# Atrioventricular block

|  | **Medical record +** | **Medical record -** | **Total** |
| --- | --- | --- | --- |
| **NDAD +** | 0 | 0 | 0 |
| **NDAD -** | 0 | 597 | 597 |
| **Total** | 0 | 597 | 597 |
| *Positive predictive value: NaN  Negative predictive value: 1.00* | | | |
|
|

# Cardiac tamponade

|  | **Medical record +** | **Medical record -** | **Total** |
| --- | --- | --- | --- |
| **NDAD +** | 2 | 0 | 2 |
| **NDAD -** | 2 | 593 | 595 |
| **Total** | 4 | 593 | 597 |
| *Positive predictive value: 1.00  Negative predictive value: 1.00* | | | |
|
|

# Embolism

|  | **Medical record +** | **Medical record -** | **Total** |
| --- | --- | --- | --- |
| **NDAD +** | 0 | 1 | 1 |
| **NDAD -** | 0 | 596 | 596 |
| **Total** | 0 | 597 | 597 |
| *Positive predictive value: 0.00  Negative predictive value: 1.00* | | | |
|
|

# Haematoma

|  | **Medical record +** | **Medical record -** | **Total** |
| --- | --- | --- | --- |
| **NDAD +** | 1 | 2 | 3 |
| **NDAD -** | 0 | 594 | 594 |
| **Total** | 1 | 596 | 597 |
| *Positive predictive value: 0.33  Negative predictive value: 1.00* | | | |
|
|

# Other/unspecified complications

|  | **Medical record +** | **Medical record -** | **Total** |
| --- | --- | --- | --- |
| **NDAD +** | 2 | 3 | 5 |
| **NDAD -** | 0 | 592 | 592 |
| **Total** | 2 | 595 | 597 |
| *Positive predictive value: 0.40  Negative predictive value: 1.00* | | | |
|
|

# Paresis of n. phrenicus

|  | **Medical record +** | **Medical record -** | **Total** |
| --- | --- | --- | --- |
| **NDAD +** | 0 | 0 | 0 |
| **NDAD -** | 0 | 597 | 597 |
| **Total** | 0 | 597 | 597 |
| *Positive predictive value: NaN  Negative predictive value: 1.00* | | | |
|
|

# Perioperative death

|  | **Medical record +** | **Medical record -** | **Total** |
| --- | --- | --- | --- |
| **NDAD +** | 0 | 0 | 0 |
| **NDAD -** | 0 | 597 | 597 |
| **Total** | 0 | 597 | 597 |
| *Positive predictive value: NaN  Negative predictive value: 1.00* | | | |
|
|

# Pneumothorax

|  | **Medical record +** | **Medical record -** | **Total** |
| --- | --- | --- | --- |
| **NDAD +** | 0 | 0 | 0 |
| **NDAD -** | 0 | 597 | 597 |
| **Total** | 0 | 597 | 597 |
| *Positive predictive value: NaN  Negative predictive value: 1.00* | | | |
|
|

# No complications

|  | **Medical record +** | **Medical record -** | **Total** |
| --- | --- | --- | --- |
| **NDAD +** | 584 | 2 | 586 |
| **NDAD -** | 6 | 5 | 11 |
| **Total** | 590 | 7 | 597 |
| *Positive predictive value: 1.00  Negative predictive value: 0.45* | | | |
|
|

##

## Late complications

# Deep vein thrombosis

|  | **Medical record +** | **Medical record -** | **Total** |
| --- | --- | --- | --- |
| **NDAD +** | 0 | 0 | 0 |
| **NDAD -** | 0 | 597 | 597 |
| **Total** | 0 | 597 | 597 |
| *Positive predictive value: NaN  Negative predictive value: 1.00* | | | |
|
|

# Infection

|  | **Medical record +** | **Medical record -** | **Total** |
| --- | --- | --- | --- |
| **NDAD +** | 0 | 2 | 2 |
| **NDAD -** | 1 | 594 | 595 |
| **Total** | 1 | 596 | 597 |
| *Positive predictive value: 0.00  Negative predictive value: 1.00* | | | |
|
|

# Pulmonary vein stenosis

|  | **Medical record +** | **Medical record -** | **Total** |
| --- | --- | --- | --- |
| **NDAD +** | 1 | 0 | 1 |
| **NDAD -** | 0 | 596 | 596 |
| **Total** | 1 | 596 | 597 |
| *Positive predictive value: 1.00  Negative predictive value: 1.00* | | | |
|
|

# Oesophageal fistula

|  | **Medical record +** | **Medical record -** | **Total** |
| --- | --- | --- | --- |
| **NDAD +** | 0 | 1 | 1 |
| **NDAD -** | 0 | 596 | 596 |
| **Total** | 0 | 597 | 597 |
| *Positive predictive value: 0.00  Negative predictive value: 1.00* | | | |
|
|

# Trancient cerebral ischaemia /ischaemic stroke

|  | **Medical record +** | **Medical record -** | **Total** |
| --- | --- | --- | --- |
| **NDAD +** | 0 | 1 | 1 |
| **NDAD -** | 0 | 596 | 596 |
| **Total** | 0 | 597 | 597 |
| *Positive predictive value: 0.00  Negative predictive value: 1.00* | | | |
|
|

# No late complications

|  | **Medical record +** | **Medical record -** | **Total** |
| --- | --- | --- | --- |
| **NDAD +** | 579 | 4 | 583 |
| **NDAD -** | 9 | 5 | 14 |
| **Total** | 588 | 9 | 597 |
| *Positive predictive value: 0.99  Negative predictive value: 0.36* | | | |
|
|

##

## CHA2DS2-VASC-parametres

# Congestive heart failure

|  | **Medical record +** | **Medical record -** | **Total** |
| --- | --- | --- | --- |
| **NDAD +** | 65 | 43 | 108 |
| **NDAD -** | 3 | 486 | 489 |
| **Total** | 68 | 529 | 597 |
| *Positive predictive value: 0.60  Negative predictive value: 0.99* | | | |
|
|

# Hypertension

|  | **Medical record +** | **Medical record -** | **Total** |
| --- | --- | --- | --- |
| **NDAD +** | 196 | 55 | 251 |
| **NDAD -** | 19 | 327 | 346 |
| **Total** | 215 | 382 | 597 |
| *Positive predictive value: 0.78  Negative predictive value: 0.95* | | | |
|
|

# Age 75+

|  | **Medical record +** | **Medical record -** | **Total** |
| --- | --- | --- | --- |
| **NDAD +** | 29 | 0 | 29 |
| **NDAD -** | 0 | 568 | 568 |
| **Total** | 29 | 568 | 597 |
| *Positive predictive value: 1.00  Negative predictive value: 1.00* | | | |
|
|

# Diabetes

|  | **Medical record +** | **Medical record -** | **Total** |
| --- | --- | --- | --- |
| **NDAD +** | 23 | 11 | 34 |
| **NDAD -** | 5 | 558 | 563 |
| **Total** | 28 | 569 | 597 |
| *Positive predictive value: 0.68  Negative predictive value: 0.99* | | | |
|
|

# Trancient cerebral ischaemia / ischaemic stroke

|  | **Medical record +** | **Medical record -** | **Total** |
| --- | --- | --- | --- |
| **NDAD +** | 38 | 14 | 52 |
| **NDAD -** | 3 | 542 | 545 |
| **Total** | 41 | 556 | 597 |
| *Positive predictive value: 0.73  Negative predictive value: 0.99* | | | |
|
|

# Peripheral artery disease

|  | **Medical record +** | **Medical record -** | **Total** |
| --- | --- | --- | --- |
| **NDAD +** | 19 | 26 | 45 |
| **NDAD -** | 8 | 544 | 552 |
| **Total** | 27 | 570 | 597 |
| *Positive predictive value: 0.42  Negative predictive value: 0.99* | | | |
|
|

# Age 65-74

|  | **Medical record +** | **Medical record -** | **Total** |
| --- | --- | --- | --- |
| **NDAD +** | 214 | 0 | 214 |
| **NDAD -** | 0 | 383 | 383 |
| **Total** | 214 | 383 | 597 |
| *Positive predictive value: 1.00  Negative predictive value: 1.00* | | | |
|
|

# Female sex

|  | **Medical record +** | **Medical record -** | **Total** |
| --- | --- | --- | --- |
| **NDAD +** | 167 | 1 | 168 |
| **NDAD -** | 1 | 428 | 429 |
| **Total** | 168 | 429 | 597 |
| *Positive predictive value: 0.99  Negative predictive value: 1.00* | | | |
|
|

# CHA2DS2-VASc-score 0

|  | **Medical record +** | **Medical record -** | **Total** |
| --- | --- | --- | --- |
| **NDAD +** | 424 | 26 | 450 |
| **NDAD -** | 17 | 130 | 147 |
| **Total** | 441 | 156 | 597 |
| *Positive predictive value: 0.94  Negative predictive value: 0.88* | | | |
|
|

# CHA2DS2-VASc-score 1

|  | **Medical record +** | **Medical record -** | **Total** |
| --- | --- | --- | --- |
| **NDAD +** | 394 | 47 | 441 |
| **NDAD -** | 24 | 132 | 156 |
| **Total** | 418 | 179 | 597 |
| *Positive predictive value: 0.89  Negative predictive value: 0.85* | | | |
|
|

# CHA2DS2-VASc-score 2

|  | **Medical record +** | **Medical record -** | **Total** |
| --- | --- | --- | --- |
| **NDAD +** | 406 | 37 | 443 |
| **NDAD -** | 43 | 111 | 154 |
| **Total** | 449 | 148 | 597 |
| *Positive predictive value: 0.92  Negative predictive value: 0.72* | | | |
|
|

# CHA2DS2-VASc-score 3

|  | **Medical record +** | **Medical record -** | **Total** |
| --- | --- | --- | --- |
| **NDAD +** | 485 | 31 | 516 |
| **NDAD -** | 28 | 53 | 81 |
| **Total** | 513 | 84 | 597 |
| *Positive predictive value: 0.94  Negative predictive value: 0.65* | | | |
|
|

# CHA2DS2-VASc-score 4

|  | **Medical record +** | **Medical record -** | **Total** |
| --- | --- | --- | --- |
| **NDAD +** | 546 | 8 | 554 |
| **NDAD -** | 28 | 15 | 43 |
| **Total** | 574 | 23 | 597 |
| *Positive predictive value: 0.99  Negative predictive value: 0.35* | | | |
|
|

# CHA2DS2-VASc-score 5

|  | **Medical record +** | **Medical record -** | **Total** |
| --- | --- | --- | --- |
| **NDAD +** | 581 | 1 | 582 |
| **NDAD -** | 11 | 4 | 15 |
| **Total** | 592 | 5 | 597 |
| *Positive predictive value: 1.00  Negative predictive value: 0.27* | | | |
|
|

# CHA2DS2-VASc-score 6

|  | **Medical record +** | **Medical record -** | **Total** |
| --- | --- | --- | --- |
| **NDAD +** | 594 | 2 | 596 |
| **NDAD -** | 1 | 0 | 1 |
| **Total** | 595 | 2 | 597 |
| *Positive predictive value: 1.00  Negative predictive value: 0.00* | | | |
|
|

##

## Cardiac history

# Aortic stenosis

|  | **Medical record +** | **Medical record -** | **Total** |
| --- | --- | --- | --- |
| **NDAD +** | 2 | 3 | 5 |
| **NDAD -** | 0 | 592 | 592 |
| **Total** | 2 | 595 | 597 |
| *Positive predictive value: 0.40  Negative predictive value: 1.00* | | | |
|
|

# Aortic regurgitation

|  | **Medical record +** | **Medical record -** | **Total** |
| --- | --- | --- | --- |
| **NDAD +** | 4 | 0 | 4 |
| **NDAD -** | 2 | 591 | 593 |
| **Total** | 6 | 591 | 597 |
| *Positive predictive value: 1.00  Negative predictive value: 1.00* | | | |
|
|

# Arrhythmogenic right ventricle

|  | **Medical record +** | **Medical record -** | **Total** |
| --- | --- | --- | --- |
| **NDAD +** | 0 | 0 | 0 |
| **NDAD -** | 0 | 597 | 597 |
| **Total** | 0 | 597 | 597 |
| *Positive predictive value: NaN  Negative predictive value: 1.00* | | | |
|
|

# Congenital cardiac disease

|  | **Medical record +** | **Medical record -** | **Total** |
| --- | --- | --- | --- |
| **NDAD +** | 0 | 1 | 1 |
| **NDAD -** | 0 | 596 | 596 |
| **Total** | 0 | 597 | 597 |
| *Positive predictive value: 0.00  Negative predictive value: 1.00* | | | |
|
|

# Dilated cardiomyopathy

|  | **Medical record +** | **Medical record -** | **Total** |
| --- | --- | --- | --- |
| **NDAD +** | 15 | 16 | 31 |
| **NDAD -** | 4 | 562 | 566 |
| **Total** | 19 | 578 | 597 |
| *Positive predictive value: 0.48  Negative predictive value: 0.99* | | | |
|
|

# Hypertrophic cardiomyopathy

|  | **Medical record +** | **Medical record -** | **Total** |
| --- | --- | --- | --- |
| **NDAD +** | 9 | 2 | 11 |
| **NDAD -** | 2 | 584 | 586 |
| **Total** | 11 | 586 | 597 |
| *Positive predictive value: 0.82  Negative predictive value: 1.00* | | | |
|
|

# Ischaemic heart disease

|  | **Medical record +** | **Medical record -** | **Total** |
| --- | --- | --- | --- |
| **NDAD +** | 45 | 13 | 58 |
| **NDAD -** | 3 | 536 | 539 |
| **Total** | 48 | 549 | 597 |
| *Positive predictive value: 0.78  Negative predictive value: 0.99* | | | |
|
|

# Mitral stenosis

|  | **Medical record +** | **Medical record -** | **Total** |
| --- | --- | --- | --- |
| **NDAD +** | 0 | 1 | 1 |
| **NDAD -** | 1 | 595 | 596 |
| **Total** | 1 | 596 | 597 |
| *Positive predictive value: 0.00  Negative predictive value: 1.00* | | | |
|
|

# Mitral regurgitation

|  | **Medical record +** | **Medical record -** | **Total** |
| --- | --- | --- | --- |
| **NDAD +** | 5 | 5 | 10 |
| **NDAD -** | 13 | 574 | 587 |
| **Total** | 18 | 579 | 597 |
| *Positive predictive value: 0.50  Negative predictive value: 0.98* | | | |
|
|

# No cardiac disease

|  | **Medical record +** | **Medical record -** | **Total** |
| --- | --- | --- | --- |
| **NDAD +** | 456 | 14 | 470 |
| **NDAD -** | 40 | 87 | 127 |
| **Total** | 496 | 101 | 597 |
| *Positive predictive value: 0.97  Negative predictive value: 0.69* | | | |
|
|

# Aortic valve replacement

|  | **Medical record +** | **Medical record -** | **Total** |
| --- | --- | --- | --- |
| **NDAD +** | 6 | 0 | 6 |
| **NDAD -** | 0 | 591 | 591 |
| **Total** | 6 | 591 | 597 |
| *Positive predictive value: 1.00  Negative predictive value: 1.00* | | | |
|
|

# Congenital surgery

|  | **Medical record +** | **Medical record -** | **Total** |
| --- | --- | --- | --- |
| **NDAD +** | 1 | 0 | 1 |
| **NDAD -** | 0 | 596 | 596 |
| **Total** | 1 | 596 | 597 |
| *Positive predictive value: 1.00  Negative predictive value: 1.00* | | | |
|
|

# Coronary artery bypass-graft surgery

|  | **Medical record +** | **Medical record -** | **Total** |
| --- | --- | --- | --- |
| **NDAD +** | 11 | 0 | 11 |
| **NDAD -** | 2 | 584 | 586 |
| **Total** | 13 | 584 | 597 |
| *Positive predictive value: 1.00  Negative predictive value: 1.00* | | | |
|
|

# Percutaneous coronary intervention

|  | **Medical record +** | **Medical record -** | **Total** |
| --- | --- | --- | --- |
| **NDAD +** | 36 | 8 | 44 |
| **NDAD -** | 4 | 549 | 553 |
| **Total** | 40 | 557 | 597 |
| *Positive predictive value: 0.82  Negative predictive value: 0.99* | | | |
|
|

# Mitral valve surgery

|  | **Medical record +** | **Medical record -** | **Total** |
| --- | --- | --- | --- |
| **NDAD +** | 5 | 0 | 5 |
| **NDAD -** | 0 | 592 | 592 |
| **Total** | 5 | 592 | 597 |
| *Positive predictive value: 1.00  Negative predictive value: 1.00* | | | |
|
|

# No previous cardiac interventions

|  | **Medical record +** | **Medical record -** | **Total** |
| --- | --- | --- | --- |
| **NDAD +** | 373 | 6 | 379 |
| **NDAD -** | 31 | 187 | 218 |
| **Total** | 404 | 193 | 597 |
| *Positive predictive value: 0.98  Negative predictive value: 0.86* | | | |
|
|

##

## Arrhythmia

# Paroxysmal AF

|  | **Medical record +** | **Medical record -** | **Total** |
| --- | --- | --- | --- |
| **NDAD +** | 337 | 42 | 379 |
| **NDAD -** | 41 | 177 | 218 |
| **Total** | 378 | 219 | 597 |
| *Positive predictive value: 0.89  Negative predictive value: 0.81* | | | |
|
|

# Persistent AF

|  | **Medical record +** | **Medical record -** | **Total** |
| --- | --- | --- | --- |
| **NDAD +** | 169 | 38 | 207 |
| **NDAD -** | 35 | 355 | 390 |
| **Total** | 204 | 393 | 597 |
| *Positive predictive value: 0.82  Negative predictive value: 0.91* | | | |
|
|

# Pacemaker +

|  | **Medical record +** | **Medical record -** | **Total** |
| --- | --- | --- | --- |
| **NDAD +** | 1 | 0 | 1 |
| **NDAD -** | 0 | 596 | 596 |
| **Total** | 1 | 596 | 597 |
| *Positive predictive value: 1.00  Negative predictive value: 1.00* | | | |
|
|

# Pacemaker -

|  | **Medical record +** | **Medical record -** | **Total** |
| --- | --- | --- | --- |
| **NDAD +** | 0 | 0 | 0 |
| **NDAD -** | 1 | 596 | 597 |
| **Total** | 1 | 596 | 597 |
| *Positive predictive value: NaN  Negative predictive value: 1.00* | | | |
|
|

# Former percutaneous ablation for AF

|  | **Medical record +** | **Medical record -** | **Total** |
| --- | --- | --- | --- |
| **NDAD +** | 54 | 10 | 64 |
| **NDAD -** | 6 | 527 | 533 |
| **Total** | 60 | 537 | 597 |
| *Positive predictive value: 0.84  Negative predictive value: 0.99* | | | |
|
|

# Former percutaneous ablation, other

|  | **Medical record +** | **Medical record -** | **Total** |
| --- | --- | --- | --- |
| **NDAD +** | 68 | 16 | 84 |
| **NDAD -** | 5 | 508 | 513 |
| **Total** | 73 | 524 | 597 |
| *Positive predictive value: 0.81  Negative predictive value: 0.99* | | | |
|
|

##

## Medication, baseline

# Amiodarone

|  | **Medical record +** | **Medical record -** | **Total** |
| --- | --- | --- | --- |
| **NDAD +** | 99 | 8 | 107 |
| **NDAD -** | 8 | 482 | 490 |
| **Total** | 107 | 490 | 597 |
| *Positive predictive value: 0.93  Negative predictive value: 0.98* | | | |
|
|

# Beta blockers

|  | **Medical record +** | **Medical record -** | **Total** |
| --- | --- | --- | --- |
| **NDAD +** | 367 | 21 | 388 |
| **NDAD -** | 32 | 177 | 209 |
| **Total** | 399 | 198 | 597 |
| *Positive predictive value: 0.95  Negative predictive value: 0.85* | | | |
|
|

# Class 1C antiarrhythmics

|  | **Medical record +** | **Medical record -** | **Total** |
| --- | --- | --- | --- |
| **NDAD +** | 65 | 7 | 72 |
| **NDAD -** | 7 | 518 | 525 |
| **Total** | 72 | 525 | 597 |
| *Positive predictive value: 0.90  Negative predictive value: 0.99* | | | |
|
|

# Digoxin

|  | **Medical record +** | **Medical record -** | **Total** |
| --- | --- | --- | --- |
| **NDAD +** | 47 | 5 | 52 |
| **NDAD -** | 5 | 540 | 545 |
| **Total** | 52 | 545 | 597 |
| *Positive predictive value: 0.90  Negative predictive value: 0.99* | | | |
|
|

# Dronedarone

|  | **Medical record +** | **Medical record -** | **Total** |
| --- | --- | --- | --- |
| **NDAD +** | 3 | 0 | 3 |
| **NDAD -** | 3 | 591 | 594 |
| **Total** | 6 | 591 | 597 |
| *Positive predictive value: 1.00  Negative predictive value: 0.99* | | | |
|
|

# Factor Xa inhibitors

|  | **Medical record +** | **Medical record -** | **Total** |
| --- | --- | --- | --- |
| **NDAD +** | 17 | 31 | 48 |
| **NDAD -** | 4 | 545 | 549 |
| **Total** | 21 | 576 | 597 |
| *Positive predictive value: 0.35  Negative predictive value: 0.99* | | | |
|
|

# Sotalol

|  | **Medical record +** | **Medical record -** | **Total** |
| --- | --- | --- | --- |
| **NDAD +** | 1 | 0 | 1 |
| **NDAD -** | 2 | 594 | 596 |
| **Total** | 3 | 594 | 597 |
| *Positive predictive value: 1.00  Negative predictive value: 1.00* | | | |
|
|

# Thrombin inhibitors

|  | **Medical record +** | **Medical record -** | **Total** |
| --- | --- | --- | --- |
| **NDAD +** | 10 | 2 | 12 |
| **NDAD -** | 34 | 551 | 585 |
| **Total** | 44 | 553 | 597 |
| *Positive predictive value: 0.83  Negative predictive value: 0.94* | | | |
|
|

# Calcium antagonists

|  | **Medical record +** | **Medical record -** | **Total** |
| --- | --- | --- | --- |
| **NDAD +** | 35 | 2 | 37 |
| **NDAD -** | 2 | 558 | 560 |
| **Total** | 37 | 560 | 597 |
| *Positive predictive value: 0.95  Negative predictive value: 1.00* | | | |
|
|

# Vitamin K antagonists

|  | **Medical record +** | **Medical record -** | **Total** |
| --- | --- | --- | --- |
| **NDAD +** | 478 | 32 | 510 |
| **NDAD -** | 19 | 68 | 87 |
| **Total** | 497 | 100 | 597 |
| *Positive predictive value: 0.94  Negative predictive value: 0.78* | | | |
|
|

##

## Medication, follow-up

# Amiodarone

|  | **Medical record +** | **Medical record -** | **Total** |
| --- | --- | --- | --- |
| **NDAD +** | 16 | 4 | 20 |
| **NDAD -** | 3 | 574 | 577 |
| **Total** | 19 | 578 | 597 |
| *Positive predictive value: 0.80  Negative predictive value: 0.99* | | | |
|
|

# Beta blockers

|  | **Medical record +** | **Medical record -** | **Total** |
| --- | --- | --- | --- |
| **NDAD +** | 199 | 18 | 217 |
| **NDAD -** | 70 | 310 | 380 |
| **Total** | 269 | 328 | 597 |
| *Positive predictive value: 0.92  Negative predictive value: 0.82* | | | |
|
|

# Class 1C

|  | **Medical record +** | **Medical record -** | **Total** |
| --- | --- | --- | --- |
| **NDAD +** | 11 | 0 | 11 |
| **NDAD -** | 3 | 72 | 75 |
| **Total** | 14 | 72 | 86 |
| *Positive predictive value: 1.00  Negative predictive value: 0.96* | | | |
|
|

# Digoxin

|  | **Medical record +** | **Medical record -** | **Total** |
| --- | --- | --- | --- |
| **NDAD +** | 11 | 0 | 11 |
| **NDAD -** | 2 | 584 | 586 |
| **Total** | 13 | 584 | 597 |
| *Positive predictive value: 1.00  Negative predictive value: 1.00* | | | |
|
|

# Dronedarone

|  | **Medical record +** | **Medical record -** | **Total** |
| --- | --- | --- | --- |
| **NDAD +** | 1 | 0 | 1 |
| **NDAD -** | 0 | 596 | 596 |
| **Total** | 1 | 596 | 597 |
| *Positive predictive value: 1.00  Negative predictive value: 1.00* | | | |
|
|

# Factor Xa inhibitors

|  | **Medical record +** | **Medical record -** | **Total** |
| --- | --- | --- | --- |
| **NDAD +** | 50 | 8 | 58 |
| **NDAD -** | 70 | 469 | 539 |
| **Total** | 120 | 477 | 597 |
| *Positive predictive value: 0.86  Negative predictive value: 0.87* | | | |
|
|

# Sotalol

|  | **Medical record +** | **Medical record -** | **Total** |
| --- | --- | --- | --- |
| **NDAD +** | 2 | 0 | 2 |
| **NDAD -** | 0 | 595 | 595 |
| **Total** | 2 | 595 | 597 |
| *Positive predictive value: 1.00  Negative predictive value: 1.00* | | | |
|
|

# Thrombin inhibitors

|  | **Medical record +** | **Medical record -** | **Total** |
| --- | --- | --- | --- |
| **NDAD +** | 13 | 2 | 15 |
| **NDAD -** | 52 | 530 | 582 |
| **Total** | 65 | 532 | 597 |
| *Positive predictive value: 0.87  Negative predictive value: 0.91* | | | |
|
|

# Calcium antagonists

|  | **Medical record +** | **Medical record -** | **Total** |
| --- | --- | --- | --- |
| **NDAD +** | 15 | 5 | 20 |
| **NDAD -** | 4 | 573 | 577 |
| **Total** | 19 | 578 | 597 |
| *Positive predictive value: 0.75  Negative predictive value: 0.99* | | | |
|
|

# Vitamin K antagonists

|  | **Medical record +** | **Medical record -** | **Total** |
| --- | --- | --- | --- |
| **NDAD +** | 174 | 20 | 194 |
| **NDAD -** | 36 | 367 | 403 |
| **Total** | 210 | 387 | 597 |
| *Positive predictive value: 0.90  Negative predictive value: 0.91* | | | |
|
|

## Relapse

# Relapse

|  | **Medical record +** | **Medical record -** | **Total** |
| --- | --- | --- | --- |
| **NDAD +** | 102 | 47 | 149 |
| **NDAD -** | 28 | 420 | 448 |
| **Total** | 130 | 467 | 597 |
| *Positive predictive value: 0.68  Negative predictive value: 0.94* | | | |
|
|

# No relapse

|  | **Medical record +** | **Medical record -** | **Total** |
| --- | --- | --- | --- |
| **NDAD +** | 296 | 13 | 309 |
| **NDAD -** | 124 | 164 | 288 |
| **Total** | 420 | 177 | 597 |
| *Positive predictive value: 0.96  Negative predictive value: 0.57* | | | |
|
|

## EHRA class at baseline

# EHRA 0

|  | **Medical record +** | **Medical record -** | **Total** |
| --- | --- | --- | --- |
| **NDAD +** | 532 | 5 | 537 |
| **NDAD -** | 37 | 23 | 60 |
| **Total** | 569 | 28 | 597 |
| *Positive predictive value: 0.99  Negative predictive value: 0.38* | | | |
|
|

# EHRA 1

|  | **Medical record +** | **Medical record -** | **Total** |
| --- | --- | --- | --- |
| **NDAD +** | 574 | 3 | 577 |
| **NDAD -** | 15 | 5 | 20 |
| **Total** | 589 | 8 | 597 |
| *Positive predictive value: 0.99  Negative predictive value: 0.25* | | | |
|
|

# EHRA 2

|  | **Medical record +** | **Medical record -** | **Total** |
| --- | --- | --- | --- |
| **NDAD +** | 353 | 30 | 383 |
| **NDAD -** | 72 | 142 | 214 |
| **Total** | 425 | 172 | 597 |
| *Positive predictive value: 0.92  Negative predictive value: 0.66* | | | |
|
|

# EHRA 3

|  | **Medical record +** | **Medical record -** | **Total** |
| --- | --- | --- | --- |
| **NDAD +** | 199 | 105 | 304 |
| **NDAD -** | 26 | 267 | 293 |
| **Total** | 225 | 372 | 597 |
| *Positive predictive value: 0.65  Negative predictive value: 0.91* | | | |
|
|

# EHRA 4

|  | **Medical record +** | **Medical record -** | **Total** |
| --- | --- | --- | --- |
| **NDAD +** | 579 | 8 | 587 |
| **NDAD -** | 1 | 9 | 10 |
| **Total** | 580 | 17 | 597 |
| *Positive predictive value: 0.99  Negative predictive value: 0.90* | | | |
|
|

##

## EHRA class at follow-up

# EHRA 0

|  | **Medical record +** | **Medical record -** | **Total** |
| --- | --- | --- | --- |
| **NDAD +** | 359 | 3 | 362 |
| **NDAD -** | 119 | 116 | 235 |
| **Total** | 478 | 119 | 597 |
| *Positive predictive value: 0.99  Negative predictive value: 0.49* | | | |
|
|

# EHRA 1

|  | **Medical record +** | **Medical record -** | **Total** |
| --- | --- | --- | --- |
| **NDAD +** | 226 | 103 | 329 |
| **NDAD -** | 10 | 258 | 268 |
| **Total** | 236 | 361 | 597 |
| *Positive predictive value: 0.69  Negative predictive value: 0.96* | | | |
|
|

# EHRA 2

|  | **Medical record +** | **Medical record -** | **Total** |
| --- | --- | --- | --- |
| **NDAD +** | 486 | 36 | 522 |
| **NDAD -** | 17 | 58 | 75 |
| **Total** | 503 | 94 | 597 |
| *Positive predictive value: 0.93  Negative predictive value: 0.77* | | | |
|
|

# EHRA 3

|  | **Medical record +** | **Medical record -** | **Total** |
| --- | --- | --- | --- |
| **NDAD +** | 572 | 7 | 579 |
| **NDAD -** | 5 | 13 | 18 |
| **Total** | 577 | 20 | 597 |
| *Positive predictive value: 0.99  Negative predictive value: 0.72* | | | |
|
|

# EHRA 4

|  | **Medical record +** | **Medical record -** | **Total** |
| --- | --- | --- | --- |
| **NDAD +** | 594 | 2 | 596 |
| **NDAD -** | 0 | 1 | 1 |
| **Total** | 594 | 3 | 597 |
| *Positive predictive value: 1.00  Negative predictive value: 1.00* | | | |
|
|

##

## Table 1: Dichotomization of continous data

|  | **Registered CHA2DS2VASc-score** | | **CHA2DS2VASC-score NDAD** | | | | | | | **CHA2DS2VASC-score, medical record** | | | | | | |
| --- | --- | --- | --- | --- | --- | --- | --- | --- | --- | --- | --- | --- | --- | --- | --- | --- |
| **Patient ID** | **NDAD** | **MR** | **0** | **1** | **2** | **3** | **4** | **5** | **6** | **0** | **1** | **2** | **3** | **4** | **5** | **6** |
| 1 | 1 | 2 | 0 | 1 | 0 | 0 | 0 | 0 | 0 | 0 | 0 | 1 | 0 | 0 | 0 | 0 |
| 2 | 3 | 4 | 0 | 0 | 0 | 1 | 0 | 0 | 0 | 0 | 0 | 0 | 0 | 1 | 0 | 0 |
| 3 | 3 | 6 | 0 | 0 | 0 | 1 | 0 | 0 | 0 | 0 | 0 | 0 | 0 | 0 | 0 | 1 |
| 4 | 4 | 3 | 0 | 0 | 0 | 0 | 1 | 0 | 0 | 0 | 0 | 0 | 1 | 0 | 0 | 0 |
| 5 | 2 | 2 | 0 | 0 | 1 | 0 | 0 | 0 | 0 | 0 | 0 | 1 | 0 | 0 | 0 | 0 |
| 6 | 3 | 3 | 0 | 0 | 0 | 1 | 0 | 0 | 0 | 0 | 0 | 0 | 1 | 0 | 0 | 0 |

## Table 2: Example of how the PPV and NPV-values were acquired


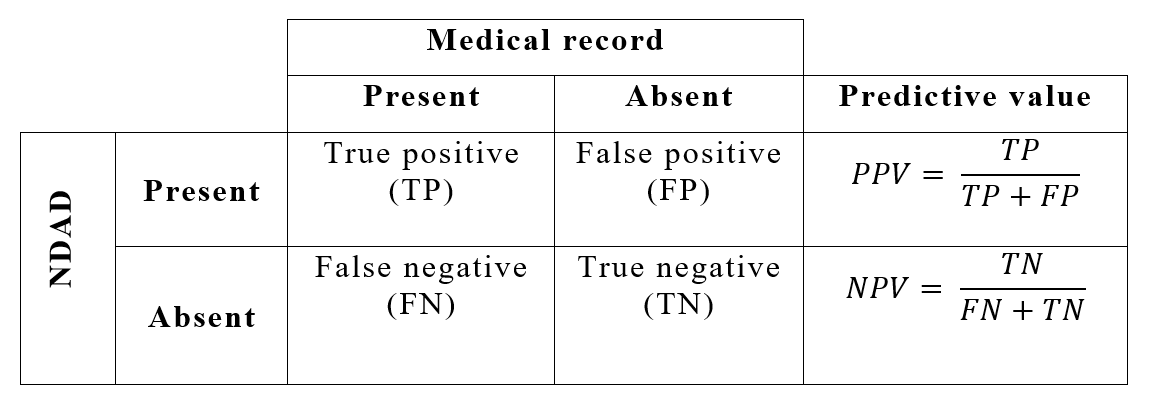

Supplement: Supplementary file 1 [file 36389048]
